# Supplementary material for: Spatiotemporal identification of druggable binding sites using deep learning
Source: PubMed Central journal article supplement (PMC7591901; doi:10.1038/s42003-020-01350-0), 2020-10-27
Supplement: 42003_2020_1350_MOESM1_ESM.pdf [file 42003_2020_1350_MOESM1_ESM.pdf]

# Supplementary Information for Spatiotemporal identification of druggable binding sites using deep learning

Igor Kozlovskii<sup>1</sup> and Petr Popov<sup>1</sup>

<sup>1</sup>Skolkovo Institute of Science and Technology, Moscow, Russia

September 25, 2020

## Binding site definition

### *P2Rank binding site filtering criterion*

This criterion filters small molecules with less than 4 atoms, as well as HOH, DOD, WAT, NAG, MAN, UNK, GLC, ADA, MPD, GOL, SO4, PO4 molecules. The ligand must be within 4Å of a protein, and the distance from the ligand center to protein must be at least 5.5Å. A prediction is considered as true positive, if the minimum distance from the predicted coordinates to the ligand is less or equal than 4Å.

### *BiteNet binding site filtering criterion*

This criterion filters out small molecules with less than 14 number of atoms, as well as detergent and buffer molecules (see Supplementary Table 1). Then binding site interface is defined as the number of protein atoms in the proximity of 4Å from the ligand, and binding sites with the interface less than 20 atoms are filtered out. A prediction is considered as true positive, if the minimum distance between the predicted coordinates and the ligand is less or equal than 4Å.

### *BiteNet binding site filtering criterion for training*

This criterion differs from the previous one only in the true positive definition. Namely, a prediction is considered as true positive, if the minimum distance between the predicted coordinates and the geometric center of the binding site is less or equal than 4Å.

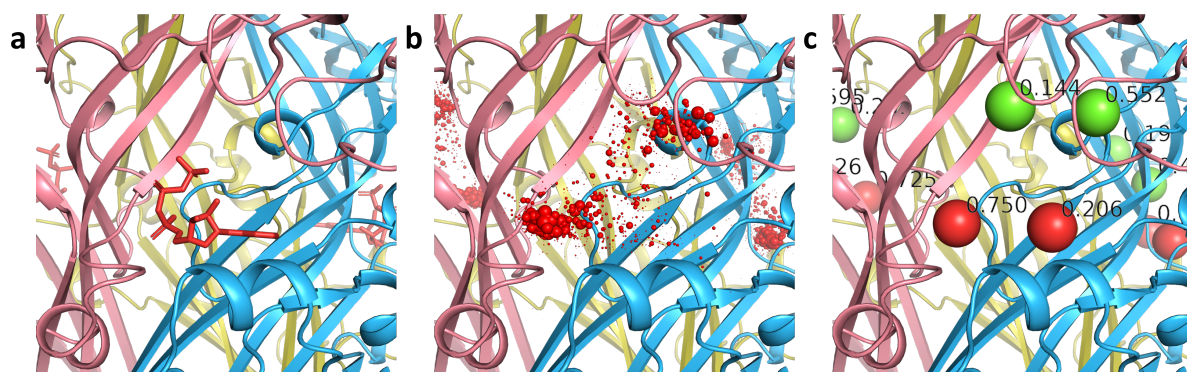

Supplementary Figure 1: BiteNet predictions for the ATP-bound P2X3 receptor trimer augmented with 50 replicas. (a) the ATP-binding site, ATP is shown with red sticks) (b) BiteNet predictions with no non max suppression. (c) BiteNet predictions filtered by the non max suppression with  $distance\_threshold = 8\text{\AA}$ .

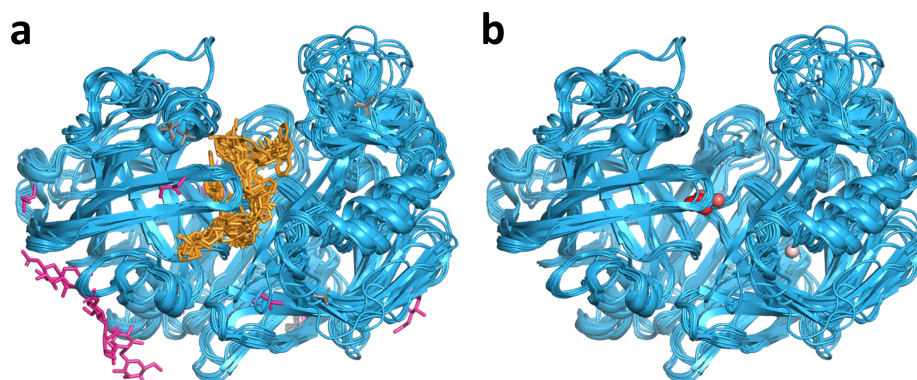

Supplementary Figure 2: Small molecules and BiteNet predictions for 29 proteins of the IPR001461 family from the HOLO4K dataset. **a** Small molecules corresponding to the relevant binding sites according to both BiteNet and P2Rank filtering criteria (yellow sticks), and only to the P2Rank filtering criterion (magenta sticks). **b** BiteNet predictions are shown with spheres colored from white to red with respect to the probability score.

Supplementary Table 1: List of the PDB identifiers filtered on the dataset preprocessing stage

| Type              | Pdb code                                                                                                                                                                                                                                                                                                             |
|-------------------|----------------------------------------------------------------------------------------------------------------------------------------------------------------------------------------------------------------------------------------------------------------------------------------------------------------------|
| unknown ligands   | UNL                                                                                                                                                                                                                                                                                                                  |
| detergents        | 12P, 15P, 1PE, 2CV, 2PE, 78M, 78N, BCR, BNG, BOG, BTB, C14, C8E, CDL, CLR, CM5, CPS, DAO, DGA, DGD, DMU, DXC, L2P, LDA, LFA, LHG, LI1, LMG, LMT, LMU, MPG, MQ7, MTN, MYR, MYS, NS5, OLA, OLB, OLC, P4C, P6G, PC1, PCW, PE4, PE5, PE8, PEE, PG6, PGV, PL9, PLC, OLM, PTY, PX4, SPN, SPO, SQD, STE, TGL, U10, YO1, HOH |
| modified residues | CSD, HYP, BMT, 5HP, ABA, AIB, CSW, OCS, DAL, DAR, DSG, DSP, DCY, CRO, DGL, DGN, DHI, DIL, DIV, DLE, DLY, DPN, DPR, DSN, DTH, DTR, DTY, DVA, CGU, KCX, LLP, CXM, FME, MLE, MVA, NLE, PTR, ORN, SEP, TPO, PCA, PVL, SAR, CEA, CSO, CSS, CSX, CME, TYS, TPQ, STY, NH2, CBX, ACE, FOR, IVA, BOC, LYR, MSE                |
| cofactors         | ADP, AMP, ATP, CMP, COA, FAD, FMN, NAP, NDP                                                                                                                                                                                                                                                                          |
| carbohydrates     | BGC, GLC, MAN, BMA, FUC, GAL, GLA, NAG, NGA, SIA, XYS                                                                                                                                                                                                                                                                |

Source: [https://www.globalphasing.com/buster/manual/maketnt/manual/lib\\_val/library\\_validation.html](https://www.globalphasing.com/buster/manual/maketnt/manual/lib_val/library_validation.html)

[//www.globalphasing.com/buster/manual/maketnt/manual/lib\\_val/library\\_validation.html](https://www.globalphasing.com/buster/manual/maketnt/manual/lib_val/library_validation.html)

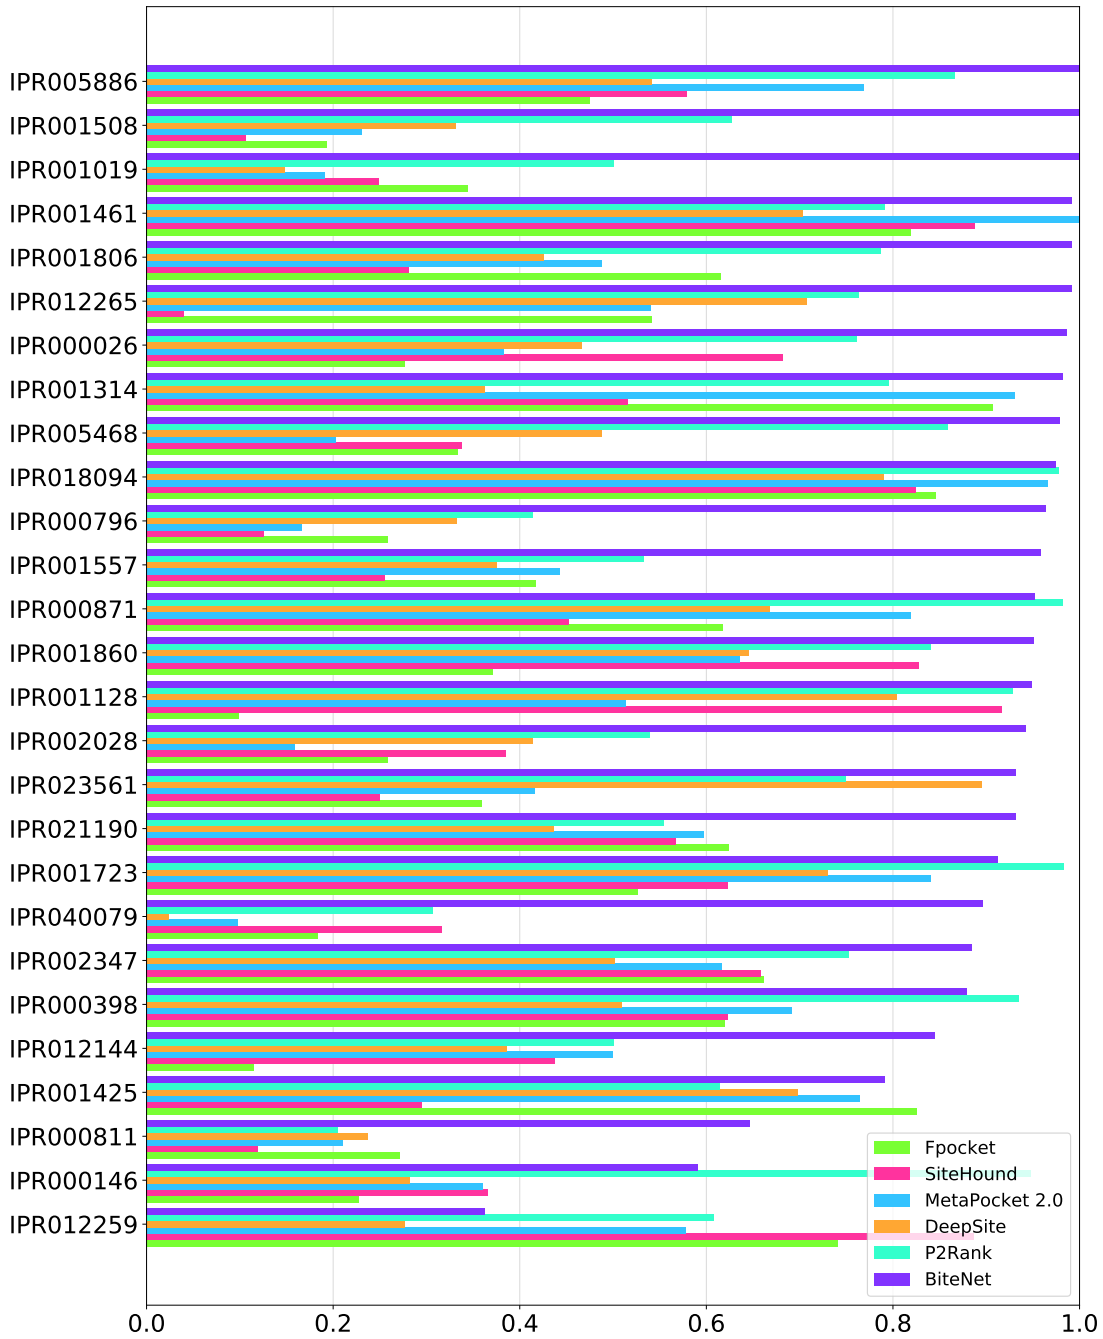

Supplementary Figure 3: The average precision metric for different methods with respect to the most represented protein families in the HOLO4K benchmark.

Supplementary Table 2: Performance of the deep learning models trained with different parameters.

| Voxel size, Å | Density cutoff, Å | Cube size | Cell size | Stride | $\gamma$ | $\lambda$ | Minibatch | Average precision |
|---------------|-------------------|-----------|-----------|--------|----------|-----------|-----------|-------------------|
| 1.0           | 2.0               | 48        | 4         | 32     | 1e-05    | 5         | 64        | 0.307             |
| 1.0           | 2.0               | 48        | 8         | 32     | 1e-05    | 5         | 64        | 0.394             |
| 1.0           | 2.0               | 48        | 16        | 32     | 1e-05    | 5         | 64        | 0.353             |
| 1.0           | 2.0               | 64        | 16        | 32     | 1e-05    | 5         | 32        | 0.383             |
| 1.0           | 2.0               | 64        | 4         | 32     | 1e-05    | 5         | 32        | 0.314             |
| 1.0           | 2.0               | 64        | 8         | 32     | 1e-05    | 5         | 4         | 0.387             |
| 1.0           | 2.0               | 64        | 8         | 32     | 1e-05    | 5         | 8         | 0.331             |
| 1.0           | 2.0               | 64        | 8         | 32     | 1e-05    | 5         | 16        | 0.429             |
| 1.0           | 2.0               | 64        | 8         | 32     | 1e-05    | 5         | 32        | 0.404             |
| 1.0           | 1.0               | 80        | 16        | 32     | 1e-05    | 5         | 16        | 0.365             |
| 1.0           | 2.0               | 80        | 16        | 32     | 1e-05    | 5         | 16        | 0.343             |
| 1.0           | 4.0               | 80        | 16        | 32     | 1e-05    | 5         | 16        | 0.387             |
| 1.0           | 8.0               | 80        | 16        | 32     | 1e-05    | 5         | 16        | 0.355             |
| 1.0           | 16.0              | 80        | 16        | 32     | 1e-05    | 5         | 16        | 0.368             |
| 1.0           | 2.0               | 80        | 16        | 32     | 0        | 5         | 16        | 0.372             |
| 1.0           | 2.0               | 80        | 16        | 32     | 1e-01    | 5         | 16        | 0.216             |
| 1.0           | 2.0               | 80        | 16        | 32     | 1e-02    | 5         | 16        | 0.264             |
| 1.0           | 2.0               | 80        | 16        | 32     | 1e-03    | 5         | 16        | 0.299             |
| 1.0           | 2.0               | 80        | 16        | 32     | 1e-04    | 5         | 16        | 0.362             |
| 1.0           | 2.0               | 80        | 16        | 32     | 1e-05    | 5         | 16        | 0.371             |
| 1.0           | 2.0               | 80        | 16        | 32     | 1e-06    | 5         | 16        | 0.351             |
| 1.0           | 2.0               | 80        | 16        | 32     | 1e-05    | 1         | 16        | 0.368             |
| 1.0           | 2.0               | 80        | 16        | 32     | 1e-05    | 10        | 16        | 0.377             |
| 1.0           | 2.0               | 80        | 16        | 32     | 1e-05    | 100       | 16        | 0.333             |
| 1.0           | 2.0               | 80        | 16        | 32     | 1e-05    | 1000      | 16        | 0.346             |
| 1.0           | 2.0               | 80        | 16        | 16     | 1e-05    | 5         | 16        | 0.272             |
| 1.0           | 2.0               | 80        | 16        | 24     | 1e-05    | 5         | 16        | 0.354             |
| 1.0           | 2.0               | 80        | 16        | 32     | 1e-05    | 5         | 16        | 0.399             |
| 1.0           | 2.0               | 80        | 16        | 48     | 1e-05    | 5         | 16        | 0.400             |
| 1.0           | 2.0               | 80        | 4         | 32     | 1e-05    | 5         | 16        | 0.302             |
| 1.0           | 2.0               | 80        | 8         | 32     | 1e-05    | 5         | 16        | 0.387             |
| 0.8           | 1.6               | 64        | 8         | 32     | 1e-05    | 5         | 32        | 0.435             |
| 1.5           | 3.0               | 64        | 8         | 32     | 1e-05    | 5         | 32        | 0.332             |
| 2.0           | 4.0               | 64        | 8         | 32     | 1e-05    | 5         | 32        | 0.283             |
| 3.0           | 6.0               | 64        | 8         | 32     | 1e-05    | 5         | 32        | 0.147             |

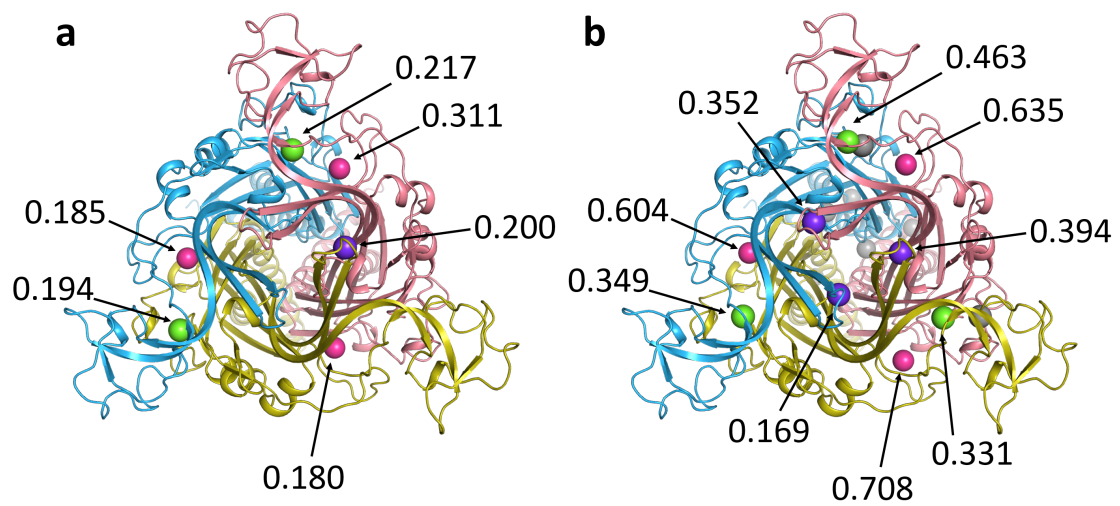

Supplementary Figure 4: BiteNet predictions obtained for the P2X3 trimer with no (a) or with (b) rotational replicas.

Supplementary Table 3: Performance metrics on the COACH420 subset of 239 proteins, which are not in the BiteNet training set, outputs of all methods are available for them and each structure contains at least one relevant binding site according to the P2Rank binding site filtering criterion.

| Criterion                                | Method               | Top-1       |             | Top-3       |             | Top-n       |             | Top-(n+2)   |             | All         |             |             |             |             |             |             |
|------------------------------------------|----------------------|-------------|-------------|-------------|-------------|-------------|-------------|-------------|-------------|-------------|-------------|-------------|-------------|-------------|-------------|-------------|
|                                          |                      | prec        | rec         | ap          | prec        | rec         | ap          | prec        | rec         | ap          | prec        | rec         | ap          |             |             |             |
| P2Rank binding site filtering criterion  | Fpocket (239)        | 0.67        | 0.50        | 0.40        | 0.28        | 0.63        | 0.46        | 0.51        | 0.56        | 0.43        | 0.26        | 0.66        | 0.46        | 0.07        | 0.76        | 0.48        |
|                                          | SiteHound (239)      | 0.58        | 0.44        | 0.29        | 0.29        | 0.65        | 0.33        | 0.47        | 0.54        | 0.33        | 0.26        | 0.68        | 0.34        | 0.02        | <b>0.94</b> | 0.34        |
|                                          | MetaPocket 2.0 (239) | 0.70        | 0.53        | 0.41        | 0.29        | 0.67        | 0.48        | 0.52        | 0.58        | 0.44        | 0.27        | 0.69        | 0.48        | 0.16        | 0.74        | 0.49        |
|                                          | DeepSite (239)       | 0.65        | 0.47        | 0.38        | 0.31        | 0.57        | 0.40        | 0.53        | 0.51        | 0.40        | 0.30        | 0.57        | 0.40        | <b>0.25</b> | 0.57        | 0.40        |
|                                          | P2Rank (239)         | 0.83        | 0.63        | 0.54        | 0.33        | 0.70        | 0.54        | 0.65        | 0.68        | 0.57        | 0.31        | 0.72        | 0.54        | 0.15        | 0.75        | 0.54        |
|                                          | <b>BiteNet (239)</b> | <b>0.87</b> | <b>0.67</b> | <b>0.64</b> | <b>0.38</b> | <b>0.77</b> | <b>0.69</b> | <b>0.67</b> | <b>0.75</b> | <b>0.68</b> | <b>0.36</b> | <b>0.79</b> | <b>0.70</b> | 0.24        | 0.81        | 0.71        |
| <b>BiteNet R<sup>+</sup> (239)</b>       | <b>0.87</b>          | 0.66        | 0.62        | 0.34        | <b>0.78</b> | <b>0.69</b> | 0.67        | <b>0.75</b> | <b>0.69</b> | 0.68        | 0.31        | <b>0.80</b> | <b>0.70</b> | 0.10        | 0.86        | <b>0.71</b> |
| BiteNet binding site filtering criterion | Fpocket (239)        | 0.49        | 0.67        | 0.37        | 0.20        | 0.80        | 0.41        | 0.67        | 0.68        | 0.54        | 0.21        | 0.80        | 0.41        | 0.05        | 0.93        | 0.42        |
|                                          | SiteHound (239)      | 0.43        | 0.58        | 0.31        | 0.20        | 0.81        | 0.34        | 0.60        | 0.62        | 0.44        | 0.22        | 0.83        | 0.35        | 0.01        | <b>0.99</b> | 0.33        |
|                                          | MetaPocket 2.0 (239) | 0.52        | 0.71        | 0.41        | 0.21        | 0.88        | 0.48        | 0.70        | 0.71        | 0.57        | 0.23        | 0.88        | 0.48        | 0.11        | 0.92        | 0.48        |
|                                          | DeepSite (239)       | 0.48        | 0.64        | 0.41        | 0.22        | 0.75        | 0.42        | 0.65        | 0.64        | 0.51        | 0.24        | 0.75        | 0.42        | <b>0.18</b> | 0.75        | 0.42        |
|                                          | P2Rank (239)         | 0.60        | 0.81        | 0.49        | 0.23        | 0.88        | 0.49        | 0.82        | 0.83        | 0.68        | 0.25        | 0.88        | 0.49        | 0.10        | 0.91        | 0.49        |
|                                          | <b>BiteNet (239)</b> | 0.62        | 0.84        | 0.57        | <b>0.25</b> | <b>0.92</b> | <b>0.59</b> | <b>0.85</b> | <b>0.85</b> | <b>0.81</b> | <b>0.28</b> | <b>0.92</b> | <b>0.59</b> | 0.16        | 0.94        | 0.60        |
| <b>BiteNet R<sup>+</sup> (239)</b>       | <b>0.62</b>          | <b>0.85</b> | <b>0.63</b> | 0.23        | <b>0.93</b> | <b>0.66</b> | <b>0.85</b> | <b>0.86</b> | 0.80        | 0.25        | <b>0.94</b> | <b>0.67</b> | 0.06        | 0.99        | <b>0.67</b> |             |
| BiteNet criterion for training           | Fpocket (239)        | 0.26        | 0.35        | 0.09        | 0.11        | 0.42        | 0.10        | 0.36        | 0.36        | 0.13        | 0.12        | 0.42        | 0.10        | 0.03        | 0.50        | 0.11        |
|                                          | SiteHound (239)      | 0.30        | 0.40        | 0.15        | 0.15        | 0.59        | 0.18        | 0.42        | 0.42        | 0.21        | 0.16        | 0.59        | 0.18        | 0.01        | 0.79        | 0.18        |
|                                          | MetaPocket 2.0 (239) | 0.29        | 0.40        | 0.12        | 0.12        | 0.51        | 0.15        | 0.39        | 0.40        | 0.17        | 0.14        | 0.51        | 0.15        | 0.07        | 0.60        | 0.16        |
|                                          | DeepSite (239)       | 0.27        | 0.36        | 0.14        | 0.12        | 0.41        | 0.15        | 0.36        | 0.36        | 0.17        | 0.13        | 0.41        | 0.15        | 0.10        | 0.41        | 0.15        |
|                                          | P2Rank (239)         | 0.42        | 0.56        | 0.24        | 0.16        | 0.59        | 0.23        | 0.57        | 0.57        | 0.33        | 0.17        | 0.59        | 0.23        | 0.07        | 0.60        | 0.23        |
|                                          | <b>BiteNet (239)</b> | <b>0.54</b> | <b>0.73</b> | <b>0.45</b> | <b>0.22</b> | <b>0.79</b> | <b>0.46</b> | <b>0.73</b> | <b>0.74</b> | <b>0.63</b> | <b>0.24</b> | <b>0.79</b> | <b>0.46</b> | <b>0.14</b> | 0.81        | 0.46        |
| <b>BiteNet R<sup>+</sup> (239)</b>       | 0.52                 | 0.72        | <b>0.49</b> | 0.19        | <b>0.80</b> | <b>0.52</b> | 0.72        | 0.73        | 0.62        | 0.21        | <b>0.80</b> | <b>0.53</b> | 0.05        | <b>0.86</b> | <b>0.53</b> |             |
| P2Rank binding site filtering criterion  | Fpocket (239)        | 159         | 80          | 174         | 229         | 488         | 128         | 178         | 167         | 155         | 237         | 575         | 119         | 312         | 3262        | 84          |
|                                          | SiteHound (239)      | 139         | 100         | 196         | 242         | 475         | 124         | 165         | 184         | 162         | 254         | 573         | 113         | <b>499</b>  | 14136       | <b>22</b>   |
|                                          | MetaPocket 2.0 (239) | 167         | 72          | 163         | 230         | 487         | 116         | 182         | 164         | 146         | 239         | 577         | 109         | 296         | 1217        | 90          |
|                                          | DeepSite (239)       | 155         | 82          | 184         | 208         | 411         | 151         | 172         | 144         | 171         | 209         | 438         | 150         | 212         | <b>549</b>  | 149         |
|                                          | P2Rank (239)         | 197         | 40          | 131         | 236         | 435         | 104         | 215         | 113         | 111         | 243         | 500         | 97          | 262         | 1330        | 88          |
|                                          | <b>BiteNet (239)</b> | <b>209</b>  | <b>30</b>   | <b>117</b>  | 275         | <b>358</b>  | 80          | 231         | <b>98</b>   | 95          | 281         | <b>401</b>  | 75          | 307         | 742         | 68          |
| <b>BiteNet R<sup>+</sup> (239)</b>       | <b>209</b>           | <b>30</b>   | 119         | <b>297</b>  | 418         | <b>78</b>   | <b>239</b>  | 110         | <b>88</b>   | <b>307</b>  | 515         | <b>70</b>   | 407         | 2449        | 49          |             |
| BiteNet binding site filtering criterion | Fpocket (239)        | 117         | 122         | 59          | 162         | 555         | 36          | 119         | 58          | 57          | 163         | 492         | 36          | 215         | 3359        | 13          |
|                                          | SiteHound (239)      | 103         | 136         | 74          | 169         | 548         | 34          | 108         | 69          | 67          | 173         | 482         | 31          | <b>323</b>  | 14312       | <b>1</b>    |
|                                          | MetaPocket 2.0 (239) | 123         | 116         | 52          | 166         | 551         | 22          | 124         | 53          | 51          | 166         | 489         | 22          | 209         | 1304        | 14          |
|                                          | DeepSite (239)       | 113         | 124         | 63          | 145         | 474         | 44          | 115         | 61          | 63          | 145         | 432         | 44          | 147         | <b>614</b>  | 44          |
|                                          | P2Rank (239)         | 142         | 95          | 33          | 164         | 507         | 22          | 144         | 31          | 31          | 166         | 456         | 21          | 179         | 1413        | 16          |
|                                          | <b>BiteNet (239)</b> | 147         | 92          | 29          | <b>183</b>  | <b>450</b>  | 15          | <b>151</b>  | <b>26</b>   | 26          | 183         | <b>397</b>  | 15          | 200         | 849         | 10          |
| <b>BiteNet R<sup>+</sup> (239)</b>       | <b>148</b>           | <b>91</b>   | <b>27</b>   | <b>199</b>  | 516         | <b>12</b>   | <b>151</b>  | <b>26</b>   | <b>25</b>   | <b>200</b>  | 453         | <b>11</b>   | 280         | 2576        | 2           |             |
| BiteNet criterion for training           | Fpocket (239)        | 62          | 177         | 115         | 75          | 642         | 102         | 63          | 114         | 114         | 75          | 580         | 102         | 89          | 3485        | 88          |
|                                          | SiteHound (239)      | 71          | 168         | 106         | 104         | 613         | 73          | 75          | 102         | 102         | 105         | 550         | 72          | 139         | 14496       | 38          |
|                                          | MetaPocket 2.0 (239) | 69          | 170         | 107         | 90          | 627         | 87          | 69          | 108         | 107         | 90          | 565         | 87          | 109         | 1404        | 71          |
|                                          | DeepSite (239)       | 64          | 173         | 113         | 75          | 544         | 104         | 64          | 112         | 113         | 75          | 502         | 104         | 75          | <b>686</b>  | 104         |
|                                          | P2Rank (239)         | 99          | 138         | 78          | 105         | 566         | 73          | 100         | 75          | 77          | 105         | 517         | 73          | 107         | 1485        | 71          |
|                                          | <b>BiteNet (239)</b> | <b>129</b>  | <b>110</b>  | <b>47</b>   | <b>139</b>  | <b>494</b>  | 37          | <b>130</b>  | <b>47</b>   | <b>46</b>   | 139         | <b>441</b>  | 37          | 143         | 906         | 33          |
| <b>BiteNet R<sup>+</sup> (239)</b>       | 125                  | 114         | 50          | <b>139</b>  | 576         | <b>36</b>   | 127         | 50          | 48          | <b>140</b>  | 513         | <b>35</b>   | <b>150</b>  | 2706        | <b>25</b>   |             |

The best score values are denoted with bold font.

Supplementary Table 4: Performance metrics on the HOLO4K subset of 1682 proteins, which are not in the BiteNet training set, outputs of all methods are available for them and each structure contains at least one relevant binding site according to the P2Rank binding site filtering criterion.

| Criterion                                | Method                | Top-1       |             | Top-3       |             | Top-n       |             | Top-(n+2)   |             | All         |             |             |             |             |             |            |
|------------------------------------------|-----------------------|-------------|-------------|-------------|-------------|-------------|-------------|-------------|-------------|-------------|-------------|-------------|-------------|-------------|-------------|------------|
|                                          |                       | prec        | rec         | ap          | prec        | rec         | ap          | prec        | rec         | ap          | prec        | rec         | ap          |             |             |            |
| P2Rank binding site filtering criterion  | Fpocket (1682)        | 0.68        | 0.38        | 0.28        | 0.37        | 0.62        | 0.41        | 0.54        | 0.59        | 0.40        | 0.32        | 0.70        | 0.44        | 0.07        | 0.81        | 0.45       |
|                                          | SiteHound (1682)      | 0.61        | 0.36        | 0.22        | 0.34        | 0.59        | 0.31        | 0.49        | 0.56        | 0.32        | 0.31        | 0.70        | 0.34        | 0.02        | <b>0.97</b> | 0.36       |
|                                          | MetaPocket 2.0 (1682) | 0.67        | 0.39        | 0.25        | 0.35        | 0.62        | 0.38        | 0.53        | 0.59        | 0.37        | 0.31        | 0.69        | 0.41        | 0.20        | 0.73        | 0.42       |
|                                          | DeepSite (1682)       | 0.73        | 0.42        | 0.32        | 0.42        | 0.58        | 0.40        | 0.65        | 0.56        | 0.42        | 0.40        | 0.59        | 0.40        | <b>0.35</b> | 0.59        | 0.40       |
|                                          | P2Rank (1682)         | 0.85        | 0.50        | 0.41        | 0.43        | 0.73        | 0.58        | 0.65        | 0.73        | 0.60        | 0.36        | 0.78        | 0.60        | 0.14        | 0.81        | 0.61       |
|                                          | <b>BiteNet (1682)</b> | 0.92        | 0.51        | 0.49        | <b>0.53</b> | 0.77        | 0.72        | <b>0.78</b> | 0.78        | 0.75        | <b>0.46</b> | 0.82        | 0.76        | 0.32        | 0.84        | 0.77       |
| <b>BiteNet R+ (1682)</b>                 | <b>0.93</b>           | <b>0.51</b> | <b>0.50</b> | <b>0.47</b> | <b>0.78</b> | <b>0.74</b> | 0.75        | <b>0.80</b> | <b>0.77</b> | 0.40        | <b>0.85</b> | <b>0.79</b> | 0.13        | 0.89        | <b>0.79</b> |            |
| BiteNet binding site filtering criterion | Fpocket (1682)        | 0.45        | 0.45        | 0.21        | 0.24        | 0.71        | 0.31        | 0.60        | 0.62        | 0.41        | 0.26        | 0.79        | 0.34        | 0.04        | 0.89        | 0.34       |
|                                          | SiteHound (1682)      | 0.42        | 0.42        | 0.19        | 0.24        | 0.70        | 0.25        | 0.56        | 0.59        | 0.35        | 0.26        | 0.77        | 0.29        | 0.01        | <b>1.00</b> | 0.28       |
|                                          | MetaPocket 2.0 (1682) | 0.48        | 0.48        | 0.21        | 0.24        | 0.73        | 0.32        | 0.61        | 0.64        | 0.40        | 0.26        | 0.79        | 0.33        | 0.13        | 0.84        | 0.34       |
|                                          | DeepSite (1682)       | 0.51        | 0.50        | 0.27        | 0.28        | 0.67        | 0.31        | 0.70        | 0.64        | 0.48        | 0.30        | 0.68        | 0.32        | <b>0.24</b> | 0.68        | 0.31       |
|                                          | P2Rank (1682)         | 0.60        | 0.60        | 0.35        | 0.29        | 0.85        | 0.48        | 0.79        | 0.83        | 0.68        | 0.30        | 0.89        | 0.51        | 0.09        | 0.92        | 0.50       |
|                                          | <b>BiteNet (1682)</b> | 0.64        | 0.63        | 0.45        | <b>0.36</b> | 0.91        | 0.64        | 0.89        | 0.90        | 0.86        | <b>0.37</b> | 0.96        | 0.68        | 0.21        | 0.97        | 0.68       |
| <b>BiteNet R+ (1682)</b>                 | <b>0.65</b>           | <b>0.63</b> | <b>0.48</b> | <b>0.32</b> | <b>0.91</b> | <b>0.68</b> | <b>0.89</b> | <b>0.91</b> | <b>0.88</b> | 0.33        | <b>0.96</b> | <b>0.71</b> | 0.08        | 0.99        | <b>0.71</b> |            |
| BiteNet criterion for training           | Fpocket (1682)        | 0.27        | 0.26        | 0.06        | 0.14        | 0.41        | 0.10        | 0.35        | 0.35        | 0.12        | 0.16        | 0.45        | 0.11        | 0.03        | 0.53        | 0.11       |
|                                          | SiteHound (1682)      | 0.30        | 0.28        | 0.08        | 0.17        | 0.49        | 0.12        | 0.40        | 0.40        | 0.15        | 0.19        | 0.54        | 0.13        | 0.01        | 0.80        | 0.14       |
|                                          | MetaPocket 2.0 (1682) | 0.27        | 0.26        | 0.06        | 0.14        | 0.40        | 0.09        | 0.34        | 0.34        | 0.10        | 0.15        | 0.45        | 0.10        | 0.08        | 0.50        | 0.10       |
|                                          | DeepSite (1682)       | 0.31        | 0.30        | 0.10        | 0.16        | 0.38        | 0.10        | 0.42        | 0.37        | 0.16        | 0.17        | 0.39        | 0.11        | 0.14        | 0.39        | 0.11       |
|                                          | P2Rank (1682)         | 0.41        | 0.39        | 0.14        | 0.19        | 0.54        | 0.17        | 0.52        | 0.52        | 0.25        | 0.20        | 0.56        | 0.18        | 0.06        | 0.58        | 0.18       |
|                                          | <b>BiteNet (1682)</b> | 0.58        | 0.55        | 0.37        | <b>0.32</b> | 0.79        | 0.52        | 0.78        | 0.78        | 0.69        | <b>0.33</b> | 0.83        | 0.55        | <b>0.19</b> | 0.84        | 0.54       |
| <b>BiteNet R+ (1682)</b>                 | <b>0.59</b>           | <b>0.56</b> | <b>0.40</b> | 0.28        | <b>0.81</b> | <b>0.57</b> | <b>0.80</b> | <b>0.80</b> | <b>0.72</b> | 0.30        | <b>0.85</b> | <b>0.59</b> | 0.07        | <b>0.88</b> | <b>0.59</b> |            |
| P2Rank binding site filtering criterion  | Fpocket (1682)        | 1140        | 542         | 1997        | 2014        | 3022        | 1228        | 1788        | 1433        | 1342        | 2322        | 4236        | 971         | 3156        | 32013       | 630        |
|                                          | SiteHound (1682)      | 1022        | 660         | 2085        | 2023        | 3023        | 1315        | 1700        | 1538        | 1432        | 2440        | 4162        | 988         | <b>4934</b> | 132214      | <b>113</b> |
|                                          | MetaPocket 2.0 (1682) | 1123        | 559         | 1980        | 1939        | 3107        | 1227        | 1719        | 1402        | 1344        | 2227        | 4107        | 1007        | 2591        | 8174        | 878        |
|                                          | DeepSite (1682)       | 1233        | 448         | 1875        | 1813        | 2328        | 1347        | 1653        | 869         | 1419        | 1829        | 2467        | 1331        | 1839        | <b>3129</b> | 1327       |
|                                          | P2Rank (1682)         | 1424        | 258         | 1616        | 2151        | 2696        | 871         | 2080        | 1078        | 886         | 2325        | 3912        | 714         | 2603        | 13944       | 604        |
|                                          | <b>BiteNet (1682)</b> | 1551        | 131         | 1582        | 2503        | <b>1868</b> | 761         | 2461        | <b>581</b>  | 698         | 2811        | <b>2612</b> | 569         | 3012        | 4974        | 521        |
| <b>BiteNet R+ (1682)</b>                 | <b>1565</b>           | <b>117</b>  | <b>1573</b> | <b>2631</b> | 2357        | <b>729</b>  | <b>2566</b> | 660         | <b>655</b>  | <b>3043</b> | 3463        | <b>495</b>  | 4032        | 17646       | 358         |            |
| BiteNet binding site filtering criterion | Fpocket (1682)        | 760         | 922         | 967         | 1313        | 3723        | 505         | 1058        | 698         | 664         | 1463        | 3652        | 378         | 2023        | 33146       | 187        |
|                                          | SiteHound (1682)      | 711         | 971         | 1017        | 1383        | 3663        | 532         | 1014        | 742         | 725         | 1554        | 3566        | 397         | <b>3140</b> | 134008      | <b>1</b>   |
|                                          | MetaPocket 2.0 (1682) | 801         | 881         | 917         | 1313        | 3733        | 471         | 1079        | 667         | 625         | 1444        | 3626        | 378         | 1709        | 9056        | 290        |
|                                          | DeepSite (1682)       | 854         | 827         | 874         | 1219        | 2922        | 575         | 1084        | 463         | 640         | 1226        | 2674        | 568         | 1234        | <b>3734</b> | 565        |
|                                          | P2Rank (1682)         | 1006        | 676         | 698         | 1463        | 3384        | 265         | 1388        | 365         | 307         | 1549        | 3417        | 196         | 1724        | 14823       | 141        |
|                                          | <b>BiteNet (1682)</b> | 1082        | 600         | 652         | 1680        | <b>2691</b> | 165         | 1570        | 179         | 170         | 1837        | <b>2659</b> | 74          | 1987        | 5999        | 53         |
| <b>BiteNet R+ (1682)</b>                 | <b>1095</b>           | <b>587</b>  | <b>644</b>  | <b>1747</b> | 3241        | <b>158</b>  | <b>1587</b> | <b>169</b>  | <b>162</b>  | <b>1932</b> | 3150        | <b>70</b>   | 2656        | 19022       | 16          |            |
| BiteNet criterion for training           | Fpocket (1682)        | 447         | 1235        | 1313        | 723         | 4313        | 1037        | 611         | 1152        | 1149        | 796         | 4326        | 964         | 938         | 34231       | 830        |
|                                          | SiteHound (1682)      | 499         | 1183        | 1262        | 863         | 4183        | 900         | 699         | 1064        | 1061        | 958         | 4169        | 804         | 1405        | 135743      | 360        |
|                                          | MetaPocket 2.0 (1682) | 454         | 1228        | 1303        | 708         | 4338        | 1050        | 588         | 1165        | 1169        | 784         | 4293        | 977         | 894         | 9871        | 884        |
|                                          | DeepSite (1682)       | 519         | 1162        | 1241        | 700         | 3441        | 1089        | 644         | 909         | 1118        | 705         | 3198        | 1084        | 707         | <b>4261</b> | 1082       |
|                                          | P2Rank (1682)         | 681         | 1001        | 1077        | 938         | 3909        | 820         | 908         | 852         | 849         | 980         | 3991        | 777         | 1021        | 15526       | 737        |
|                                          | <b>BiteNet (1682)</b> | 967         | 715         | 793         | 1384        | <b>2987</b> | 376         | 1373        | 382         | 387         | 1463        | <b>3035</b> | 297         | 1480        | 6506        | 280        |
| <b>BiteNet R+ (1682)</b>                 | <b>985</b>            | <b>697</b>  | <b>774</b>  | <b>1417</b> | 3571        | <b>342</b>  | <b>1402</b> | <b>361</b>  | <b>357</b>  | <b>1499</b> | 3590        | <b>260</b>  | <b>1552</b> | 20126       | <b>207</b>  |            |

The best score values are denoted with bold font.

Supplementary Table 5: Performance metrics for the entire COACH420 dataset.

| Criterion                                | Method                             | Top-1       |             | Top-3       |             | Top-n       |             | Top-(n+2)   |             | All         |             |             |             |             |             |             |
|------------------------------------------|------------------------------------|-------------|-------------|-------------|-------------|-------------|-------------|-------------|-------------|-------------|-------------|-------------|-------------|-------------|-------------|-------------|
|                                          |                                    | prec        | ap          | prec        | ap          | prec        | ap          | prec        | ap          | prec        | ap          |             |             |             |             |             |
| P2Rank binding site filtering criterion  | Fpocket (420)                      | 0.63        | 0.49        | 0.37        | 0.63        | 0.43        | 0.51        | 0.56        | 0.41        | 0.25        | 0.66        | 0.44        | 0.07        | 0.76        | 0.45        |             |
|                                          | SiteHound (284)                    | 0.57        | 0.44        | 0.23        | 0.28        | 0.64        | 0.33        | 0.47        | 0.53        | 0.33        | 0.25        | 0.67        | 0.33        | 0.02        | <b>0.93</b> | 0.34        |
|                                          | MetaPocket 2.0 (417)               | 0.71        | 0.56        | 0.44        | 0.29        | 0.69        | 0.51        | 0.55        | 0.61        | 0.47        | 0.27        | 0.71        | 0.51        | 0.15        | 0.76        | 0.52        |
|                                          | DeepSite (420)                     | 0.64        | 0.49        | 0.37        | 0.30        | 0.57        | 0.37        | 0.54        | 0.52        | 0.39        | 0.29        | 0.58        | 0.38        | <b>0.25</b> | 0.58        | 0.38        |
|                                          | P2Rank (420)                       | 0.79        | 0.62        | 0.54        | 0.32        | 0.71        | 0.55        | 0.64        | 0.67        | 0.56        | 0.31        | 0.72        | 0.56        | 0.15        | 0.74        | 0.55        |
|                                          | <b>BiteNet (420)</b>               | <b>0.83</b> | <b>0.65</b> | 0.60        | <b>0.37</b> | 0.77        | 0.67        | <b>0.70</b> | 0.72        | 0.66        | <b>0.36</b> | 0.79        | 0.68        | 0.23        | 0.81        | 0.68        |
|                                          | <b>BiteNet R<sup>+</sup> (420)</b> | 0.83        | 0.65        | <b>0.61</b> | 0.34        | <b>0.78</b> | <b>0.69</b> | 0.66        | <b>0.73</b> | <b>0.67</b> | 0.31        | <b>0.81</b> | <b>0.70</b> | 0.09        | 0.85        | <b>0.71</b> |
| BiteNet binding site filtering criterion | Fpocket (420)                      | 0.48        | 0.66        | 0.37        | 0.19        | 0.79        | 0.40        | 0.67        | 0.67        | 0.50        | 0.21        | 0.79        | 0.40        | 0.05        | 0.91        | 0.41        |
|                                          | SiteHound (284)                    | 0.44        | 0.59        | 0.31        | 0.20        | 0.81        | 0.34        | 0.61        | 0.62        | 0.43        | 0.22        | 0.83        | 0.35        | 0.01        | <b>1.00</b> | 0.34        |
|                                          | MetaPocket 2.0 (417)               | 0.52        | 0.73        | 0.41        | 0.21        | 0.88        | 0.47        | 0.72        | 0.73        | 0.58        | 0.23        | 0.88        | 0.47        | 0.11        | 0.93        | 0.48        |
|                                          | DeepSite (420)                     | 0.47        | 0.64        | 0.37        | 0.21        | 0.73        | 0.36        | 0.65        | 0.64        | 0.47        | 0.23        | 0.73        | 0.36        | <b>0.18</b> | 0.73        | 0.36        |
|                                          | P2Rank (420)                       | 0.59        | 0.81        | 0.51        | 0.23        | 0.89        | 0.52        | 0.82        | 0.82        | 0.71        | 0.25        | 0.90        | 0.52        | 0.11        | 0.92        | 0.52        |
|                                          | <b>BiteNet (420)</b>               | <b>0.60</b> | 0.83        | 0.55        | <b>0.25</b> | 0.92        | 0.58        | <b>0.84</b> | 0.84        | 0.78        | <b>0.28</b> | 0.92        | 0.58        | 0.15        | 0.94        | 0.58        |
|                                          | <b>BiteNet R<sup>+</sup> (420)</b> | 0.60        | <b>0.83</b> | <b>0.59</b> | 0.23        | <b>0.94</b> | <b>0.63</b> | 0.83        | <b>0.84</b> | <b>0.79</b> | 0.25        | <b>0.95</b> | <b>0.64</b> | 0.06        | 0.99        | <b>0.64</b> |
| BiteNet criterion for training           | Fpocket (420)                      | 0.27        | 0.37        | 0.11        | 0.11        | 0.46        | 0.12        | 0.37        | 0.37        | 0.14        | 0.12        | 0.46        | 0.12        | 0.03        | 0.53        | 0.12        |
|                                          | SiteHound (284)                    | 0.30        | 0.40        | 0.14        | 0.15        | 0.59        | 0.17        | 0.42        | 0.42        | 0.20        | 0.16        | 0.59        | 0.17        | 0.010       | 0.79        | 0.17        |
|                                          | MetaPocket 2.0 (417)               | 0.27        | 0.38        | 0.10        | 0.12        | 0.48        | 0.12        | 0.38        | 0.38        | 0.14        | 0.13        | 0.48        | 0.12        | 0.06        | 0.55        | 0.13        |
|                                          | DeepSite (420)                     | 0.25        | 0.34        | 0.11        | 0.11        | 0.39        | 0.12        | 0.34        | 0.34        | 0.14        | 0.12        | 0.39        | 0.12        | 0.10        | 0.39        | 0.12        |
|                                          | P2Rank (420)                       | 0.38        | 0.52        | 0.20        | 0.15        | 0.56        | 0.20        | 0.53        | 0.52        | 0.27        | 0.16        | 0.56        | 0.20        | 0.07        | 0.57        | 0.20        |
|                                          | <b>BiteNet (420)</b>               | 0.51        | 0.70        | 0.42        | <b>0.21</b> | 0.77        | 0.44        | <b>0.70</b> | 0.70        | 0.59        | <b>0.23</b> | 0.77        | 0.44        | <b>0.13</b> | 0.79        | 0.44        |
|                                          | <b>BiteNet R<sup>+</sup> (420)</b> | <b>0.51</b> | <b>0.71</b> | <b>0.46</b> | <b>0.20</b> | <b>0.82</b> | <b>0.50</b> | 0.71        | <b>0.72</b> | <b>0.62</b> | 0.22        | <b>0.82</b> | <b>0.51</b> | 0.05        | <b>0.86</b> | <b>0.51</b> |
| P2Rank binding site filtering criterion  | Fpocket (420)                      | 265         | 155         | 298         | 386         | 869         | 214         | 301         | 279         | 260         | 403         | 999         | 197         | 522         | 5612        | 143         |
|                                          | SiteHound (284)                    | 161         | 123         | 225         | 278         | 574         | 144         | 191         | 210         | 188         | 290         | 679         | 133         | 577         | 16527       | 27          |
|                                          | MetaPocket 2.0 (417)               | 294         | 123         | 255         | 405         | 846         | 178         | 322         | 256         | 226         | 423         | 979         | 166         | 517         | 2117        | 139         |
|                                          | DeepSite (420)                     | 268         | 149         | 300         | 358         | 727         | 250         | 295         | 240         | 282         | 360         | 769         | 248         | 366         | <b>961</b>  | 247         |
|                                          | P2Rank (420)                       | 329         | 87          | 220         | 405         | 755         | 171         | 353         | 194         | 195         | 414         | 846         | 162         | 445         | 2186        | 152         |
|                                          | <b>BiteNet (420)</b>               | <b>348</b>  | <b>71</b>   | <b>204</b>  | 469         | <b>635</b>  | 134         | 387         | <b>163</b>  | 163         | 480         | <b>696</b>  | 124         | 528         | 1364        | 113         |
|                                          | <b>BiteNet R<sup>+</sup> (420)</b> | <b>348</b>  | 72          | 207         | <b>510</b>  | 744         | <b>126</b>  | <b>393</b>  | 188         | <b>160</b>  | <b>528</b>  | 881         | <b>111</b>  | <b>696</b>  | 4249        | <b>85</b>   |
| BiteNet binding site filtering criterion | Fpocket (420)                      | 200         | 220         | 104         | 272         | 983         | 65          | 203         | 102         | 101         | 273         | 868         | 65          | 360         | 5774        | 28          |
|                                          | SiteHound (284)                    | 124         | 160         | 88          | 204         | 648         | 40          | 129         | 83          | 81          | 208         | 572         | 37          | 391         | 16713       | 1           |
|                                          | MetaPocket 2.0 (417)               | 217         | 200         | 83          | 291         | 960         | 35          | 219         | 84          | 81          | 291         | 846         | 35          | 363         | 2271        | 22          |
|                                          | DeepSite (420)                     | 194         | 223         | 110         | 247         | 838         | 84          | 196         | 107         | 110         | 247         | 758         | 84          | 253         | <b>1074</b> | 82          |
|                                          | P2Rank (420)                       | 245         | 171         | 57          | 290         | 870         | 33          | 247         | 54          | 55          | 292         | 780         | 32          | 315         | 2316        | 26          |
|                                          | <b>BiteNet (420)</b>               | <b>251</b>  | <b>168</b>  | 53          | 320         | <b>784</b>  | 26          | <b>255</b>  | <b>49</b>   | 50          | 321         | <b>692</b>  | 25          | 359         | 1533        | 17          |
|                                          | <b>BiteNet R<sup>+</sup> (420)</b> | <b>251</b>  | 169         | <b>52</b>   | <b>347</b>  | 907         | <b>18</b>   | <b>255</b>  | 50          | <b>49</b>   | <b>350</b>  | 789         | <b>15</b>   | <b>488</b>  | 4457        | <b>4</b>    |
| BiteNet criterion for training           | Fpocket (420)                      | 113         | 307         | 192         | 139         | 1116        | 166         | 114         | 191         | 191         | 139         | 1002        | 166         | 163         | 5971        | 142         |
|                                          | SiteHound (284)                    | 84          | 200         | 128         | 124         | 728         | 88          | 88          | 124         | 124         | 125         | 655         | 87          | 168         | 16936       | 45          |
|                                          | MetaPocket 2.0 (417)               | 114         | 303         | 188         | 146         | 1105        | 157         | 115         | 188         | 187         | 146         | 991         | 157         | 173         | 2461        | 136         |
|                                          | DeepSite (420)                     | 104         | 313         | 201         | 125         | 960         | 186         | 104         | 199         | 201         | 125         | 880         | 186         | 127         | <b>1200</b> | 185         |
|                                          | P2Rank (420)                       | 157         | 259         | 148         | 171         | 989         | 135         | 158         | 143         | 147         | 171         | 901         | 135         | 176         | 2455        | 130         |
|                                          | <b>BiteNet (420)</b>               | 212         | <b>207</b>  | 92          | 235         | <b>869</b>  | 69          | 213         | 91          | 91          | 235         | <b>778</b>  | 69          | 241         | 1651        | 63          |
|                                          | <b>BiteNet R<sup>+</sup> (420)</b> | <b>213</b>  | <b>207</b>  | <b>90</b>   | <b>247</b>  | 1007        | <b>56</b>   | <b>216</b>  | <b>89</b>   | <b>87</b>   | <b>249</b>  | 890         | <b>54</b>   | <b>261</b>  | 4684        | <b>42</b>   |

The best score values are denoted with bold font. Top TP, FP, FN scores apply only to methods assessed on the same set of proteins as BiteNet.



Supplementary Table 6: Performance metrics for the entire HOLO4K dataset.

| Criterion                                | Method                | Top-1       |             | Top-3       |             | Top-n       |             | Top-(n+2)   |             | All         |             |             |              |             |              |      |
|------------------------------------------|-----------------------|-------------|-------------|-------------|-------------|-------------|-------------|-------------|-------------|-------------|-------------|-------------|--------------|-------------|--------------|------|
|                                          |                       | prec        | rec         | ap          | prec        | rec         | ap          | prec        | rec         | ap          | prec        | rec         | ap           |             |              |      |
| P2Rank binding site filtering criterion  | Fpocket (4009)        | 0.62        | 0.29        | 0.19        | 0.37        | 0.51        | 0.31        | 0.48        | 0.53        | 0.33        | 0.32        | 0.63        | 0.36         | 0.06        | 0.78         | 0.38 |
|                                          | SiteHound (2878)      | 0.56        | 0.27        | 0.14        | 0.34        | 0.49        | 0.22        | 0.44        | 0.51        | 0.24        | 0.30        | 0.64        | 0.26         | 0.02        | <b>0.97</b>  | 0.29 |
|                                          | MetaPocket 2.0 (2575) | 0.65        | 0.38        | 0.23        | 0.35        | 0.62        | 0.37        | 0.53        | 0.59        | 0.36        | 0.31        | 0.69        | 0.40         | 0.20        | 0.73         | 0.41 |
|                                          | DeepSite (3991)       | 0.69        | 0.33        | 0.23        | 0.43        | 0.48        | 0.30        | 0.62        | 0.47        | 0.32        | 0.42        | 0.49        | 0.31         | <b>0.37</b> | 0.49         | 0.31 |
|                                          | P2Rank (4542)         | 0.81        | 0.40        | 0.31        | 0.46        | 0.65        | 0.50        | 0.61        | 0.69        | 0.54        | 0.37        | 0.75        | 0.56         | 0.13        | 0.79         | 0.56 |
|                                          | <b>BiteNet (4542)</b> | 0.91        | <b>0.42</b> | 0.40        | <b>0.57</b> | 0.70        | 0.66        | <b>0.76</b> | 0.79        | 0.75        | <b>0.48</b> | 0.84        | 0.76         | 0.29        | 0.86         | 0.77 |
| <b>BiteNet R<sup>+</sup> (4542)</b>      | <b>0.92</b>           | 0.42        | <b>0.40</b> | 0.52        | <b>0.71</b> | <b>0.67</b> | 0.75        | <b>0.81</b> | <b>0.77</b> | 0.44        | <b>0.86</b> | <b>0.78</b> | 0.14         | 0.90        | <b>0.79</b>  |      |
| BiteNet binding site filtering criterion | Fpocket (4009)        | 0.41        | 0.33        | 0.14        | 0.25        | 0.58        | 0.23        | 0.51        | 0.54        | 0.32        | 0.26        | 0.68        | 0.26         | 0.04        | 0.86         | 0.28 |
|                                          | SiteHound (2878)      | 0.39        | 0.32        | 0.12        | 0.23        | 0.56        | 0.17        | 0.48        | 0.51        | 0.23        | 0.27        | 0.68        | 0.21         | 0.01        | <b>1.00</b>  | 0.22 |
|                                          | MetaPocket 2.0 (2575) | 0.48        | 0.46        | 0.20        | 0.25        | 0.73        | 0.31        | 0.61        | 0.64        | 0.39        | 0.27        | 0.79        | 0.34         | 0.14        | 0.84         | 0.34 |
|                                          | DeepSite (3991)       | 0.48        | 0.38        | 0.19        | 0.29        | 0.55        | 0.24        | 0.65        | 0.52        | 0.35        | 0.31        | 0.55        | 0.25         | <b>0.25</b> | 0.56         | 0.24 |
|                                          | P2Rank (4542)         | 0.58        | 0.47        | 0.27        | 0.31        | 0.74        | 0.41        | 0.73        | 0.77        | 0.60        | 0.32        | 0.83        | 0.47         | 0.09        | 0.87         | 0.45 |
|                                          | <b>BiteNet (4542)</b> | 0.64        | 0.50        | 0.36        | <b>0.39</b> | 0.82        | 0.58        | 0.85        | 0.87        | 0.82        | <b>0.40</b> | 0.94        | 0.67         | 0.19        | 0.97         | 0.66 |
| <b>BiteNet R<sup>+</sup> (4542)</b>      | <b>0.64</b>           | <b>0.50</b> | <b>0.38</b> | 0.35        | <b>0.82</b> | <b>0.62</b> | <b>0.86</b> | <b>0.88</b> | <b>0.84</b> | 0.37        | <b>0.95</b> | <b>0.71</b> | 0.09         | 0.99        | <b>0.70</b>  |      |
| BiteNet criterion for training           | Fpocket (4009)        | 0.23        | 0.17        | 0.04        | 0.13        | 0.31        | 0.06        | 0.28        | 0.28        | 0.08        | 0.14        | 0.36        | 0.07         | 0.02        | 0.46         | 0.08 |
|                                          | SiteHound (2878)      | 0.26        | 0.20        | 0.05        | 0.16        | 0.38        | 0.07        | 0.32        | 0.32        | 0.09        | 0.17        | 0.45        | 0.09         | 0.01        | 0.77         | 0.10 |
|                                          | MetaPocket 2.0 (2575) | 0.26        | 0.24        | 0.05        | 0.14        | 0.39        | 0.08        | 0.33        | 0.33        | 0.10        | 0.16        | 0.44        | 0.09         | 0.08        | 0.49         | 0.10 |
|                                          | DeepSite (3991)       | 0.27        | 0.21        | 0.06        | 0.16        | 0.29        | 0.07        | 0.35        | 0.28        | 0.10        | 0.17        | 0.29        | 0.07         | 0.14        | 0.29         | 0.07 |
|                                          | P2Rank (4542)         | 0.36        | 0.28        | 0.08        | 0.19        | 0.43        | 0.12        | 0.44        | 0.44        | 0.17        | 0.19        | 0.48        | 0.14         | 0.05        | 0.51         | 0.13 |
|                                          | <b>BiteNet (4542)</b> | 0.56        | 0.44        | 0.29        | <b>0.34</b> | 0.71        | 0.47        | 0.74        | 0.74        | 0.65        | <b>0.35</b> | 0.80        | 0.53         | <b>0.17</b> | 0.83         | 0.53 |
| <b>BiteNet R<sup>+</sup> (4542)</b>      | <b>0.57</b>           | <b>0.44</b> | <b>0.32</b> | 0.32        | <b>0.73</b> | <b>0.52</b> | <b>0.76</b> | <b>0.76</b> | <b>0.69</b> | 0.33        | <b>0.82</b> | <b>0.59</b> | 0.08         | <b>0.86</b> | <b>0.58</b>  |      |
| P2Rank binding site filtering criterion  | Fpocket (4009)        | 2490        | 1519        | 6771        | 4788        | 7208        | 4612        | 4656        | 4818        | 4496        | 6006        | 11435       | 3492         | 8905        | 99369        | 2052 |
|                                          | SiteHound (2878)      | 1608        | 1270        | 4900        | 3366        | 5268        | 3418        | 3159        | 3577        | 3282        | 4511        | 7981        | 2437         | 10637       | 276793       | 181  |
|                                          | MetaPocket 2.0 (2575) | 1677        | 898         | 3114        | 2948        | 4777        | 1913        | 2637        | 2272        | 2075        | 3424        | 6359        | 1552         | 4009        | 12422        | 1344 |
|                                          | DeepSite (3991)       | 2760        | 1228        | 6379        | 4250        | 5306        | 4905        | 3961        | 2374        | 5015        | 4324        | 5639        | 4823         | 4346        | 6791         | 4814 |
|                                          | P2Rank (4542)         | 3699        | 842         | 6475        | 6199        | 7001        | 3796        | 6553        | 4044        | 3280        | 7311        | 11702       | 2710         | 8321        | 48776        | 2220 |
|                                          | <b>BiteNet (4542)</b> | 4128        | 414         | <b>6254</b> | 7400        | <b>4790</b> | 3212        | 8182        | <b>2118</b> | 2240        | 9368        | <b>7855</b> | 1741         | 10492       | <b>18811</b> | 1457 |
| <b>BiteNet R<sup>+</sup> (4542)</b>      | <b>4160</b>           | <b>382</b>  | 6269        | <b>7759</b> | 5763        | <b>3152</b> | <b>8490</b> | 2194        | <b>2066</b> | <b>9999</b> | 9583        | <b>1549</b> | <b>13145</b> | 51252       | <b>1071</b>  |      |
| BiteNet binding site filtering criterion | Fpocket (4009)        | 1656        | 2353        | 3504        | 3168        | 8828        | 2168        | 2722        | 2499        | 2420        | 3730        | 9488        | 1666         | 5783        | 102491       | 745  |
|                                          | SiteHound (2878)      | 1126        | 1752        | 2532        | 2312        | 6322        | 1624        | 1832        | 1874        | 1820        | 2821        | 6641        | 1182         | 6928        | 280502       | 3    |
|                                          | MetaPocket 2.0 (2575) | 1231        | 1344        | 1525        | 2081        | 5644        | 773         | 1717        | 1082        | 1022        | 2328        | 5568        | 595          | 2775        | 13656        | 454  |
|                                          | DeepSite (3991)       | 1918        | 2070        | 3216        | 2872        | 6684        | 2367        | 2616        | 1400        | 2482        | 2916        | 6159        | 2321         | 2935        | 8202         | 2314 |
|                                          | P2Rank (4542)         | 2630        | 1911        | 3121        | 4252        | 8948        | 1514        | 4308        | 1586        | 1373        | 4826        | 9801        | 992          | 5464        | 51633        | 742  |
|                                          | <b>BiteNet (4542)</b> | 2892        | 1650        | <b>2939</b> | 5029        | <b>7161</b> | 1067        | 5078        | 794         | 757         | 6007        | <b>7595</b> | 348          | 6894        | <b>22409</b> | 171  |
| <b>BiteNet R<sup>+</sup> (4542)</b>      | <b>2904</b>           | <b>1638</b> | 2943        | <b>5233</b> | 8289        | <b>1042</b> | <b>5148</b> | <b>748</b>  | <b>704</b>  | <b>6272</b> | 8632        | <b>314</b>  | <b>8653</b>  | 55744       | <b>84</b>    |      |
| BiteNet criterion for training           | Fpocket (4009)        | 906         | 3103        | 4321        | 1608        | 10388       | 3616        | 1444        | 3789        | 3778        | 1876        | 11354       | 3346         | 2418        | 105856       | 2813 |
|                                          | SiteHound (2878)      | 748         | 2130        | 2961        | 1398        | 7236        | 2316        | 1193        | 2521        | 2514        | 1662        | 7808        | 2049         | 2858        | 284572       | 867  |
|                                          | MetaPocket 2.0 (2575) | 677         | 1898        | 2140        | 1101        | 6624        | 1719        | 914         | 1896        | 1902        | 1241        | 6666        | 1580         | 1415        | 15016        | 1436 |
|                                          | DeepSite (3991)       | 1086        | 2902        | 4126        | 1554        | 8002        | 3706        | 1431        | 2595        | 3782        | 1571        | 7508        | 3689         | 1577        | 9560         | 3685 |
|                                          | P2Rank (4542)         | 1622        | 2919        | 4285        | 2507        | 10693       | 3393        | 2589        | 3318        | 3304        | 2832        | 11805       | 3062         | 2998        | 54099        | 2902 |
|                                          | <b>BiteNet (4542)</b> | 2566        | 1976        | 3341        | 4158        | <b>8032</b> | 1744        | 4369        | 1515        | 1529        | 4735        | <b>8873</b> | 1163         | 4900        | <b>24403</b> | 998  |
| <b>BiteNet R<sup>+</sup> (4542)</b>      | <b>2599</b>           | <b>1943</b> | <b>3308</b> | <b>4281</b> | 9241        | <b>1621</b> | <b>4493</b> | <b>1416</b> | <b>1407</b> | <b>4850</b> | 10067       | <b>1050</b> | <b>5065</b>  | 59332       | <b>835</b>   |      |

The best score values are denoted with bold font. Top TP, FP, FN scores apply only to methods assessed on the same set of proteins as BiteNet.

Supplementary Table 7: Performance metrics on the COACH420 subset of 352 proteins, which are not in the BiteNet training set and each structure contains at least one relevant binding site according to the P2Rank binding site filtering criterion.

| Criterion                                | Method                             | Top-1       |             | Top-3       |             | Top-n       |             | Top-(n+2)   |             | All         |             |             |             |             |             |
|------------------------------------------|------------------------------------|-------------|-------------|-------------|-------------|-------------|-------------|-------------|-------------|-------------|-------------|-------------|-------------|-------------|-------------|
|                                          |                                    | prec        | ap          | prec        | ap          | prec        | ap          | prec        | ap          | prec        | ap          |             |             |             |             |
| P2Rank binding site filtering criterion  | Fpocket (352)                      | 0.66        | 0.50        | 0.28        | 0.64        | 0.43        | 0.56        | 0.41        | 0.26        | 0.66        | 0.44        | 0.07        | 0.76        | 0.45        |             |
|                                          | SiteHound (240)                    | 0.58        | 0.44        | 0.29        | 0.64        | 0.33        | 0.47        | 0.53        | 0.26        | 0.67        | 0.34        | 0.02        | <b>0.94</b> | 0.34        |             |
|                                          | MetaPocket 2.0 (349)               | 0.73        | 0.56        | 0.44        | 0.30        | 0.69        | 0.55        | 0.61        | 0.27        | 0.71        | 0.52        | 0.16        | 0.76        | 0.53        |             |
|                                          | DeepSite (352)                     | 0.65        | 0.47        | 0.37        | 0.31        | 0.56        | 0.38        | 0.50        | 0.30        | 0.56        | 0.38        | <b>0.26</b> | 0.57        | 0.38        |             |
|                                          | P2Rank (352)                       | 0.81        | 0.62        | 0.53        | 0.33        | 0.70        | 0.54        | 0.64        | 0.31        | 0.72        | 0.54        | 0.15        | 0.74        | 0.54        |             |
|                                          | <b>BiteNet (352)</b>               | 0.86        | <b>0.65</b> | 0.61        | <b>0.38</b> | 0.77        | 0.68        | <b>0.69</b> | 0.72        | 0.66        | <b>0.36</b> | 0.79        | 0.23        | 0.81        | 0.69        |
|                                          | <b>BiteNet R<sup>+</sup> (352)</b> | <b>0.86</b> | 0.65        | <b>0.61</b> | 0.34        | <b>0.78</b> | <b>0.69</b> | 0.66        | <b>0.73</b> | <b>0.67</b> | 0.31        | <b>0.81</b> | 0.09        | 0.85        | <b>0.71</b> |
| BiteNet binding site filtering criterion | Fpocket (352)                      | 0.48        | 0.67        | 0.36        | 0.19        | 0.79        | 0.69        | 0.52        | 0.21        | 0.79        | 0.39        | 0.04        | 0.92        | 0.40        |             |
|                                          | SiteHound (240)                    | 0.43        | 0.58        | 0.31        | 0.20        | 0.80        | 0.33        | 0.61        | 0.22        | 0.82        | 0.34        | 0.01        | <b>0.99</b> | 0.33        |             |
|                                          | MetaPocket 2.0 (349)               | 0.51        | 0.73        | 0.40        | 0.21        | 0.88        | 0.46        | 0.72        | 0.23        | 0.88        | 0.46        | 0.10        | 0.92        | 0.47        |             |
|                                          | DeepSite (352)                     | 0.45        | 0.63        | 0.37        | 0.21        | 0.73        | 0.36        | 0.64        | 0.22        | 0.73        | 0.37        | <b>0.17</b> | 0.73        | 0.36        |             |
|                                          | P2Rank (352)                       | 0.58        | 0.82        | 0.48        | 0.22        | 0.89        | 0.48        | 0.82        | 0.25        | 0.89        | 0.48        | 0.10        | 0.92        | 0.48        |             |
|                                          | <b>BiteNet (352)</b>               | 0.59        | 0.82        | 0.52        | <b>0.25</b> | 0.91        | 0.56        | 0.83        | 0.27        | 0.92        | 0.56        | 0.15        | 0.95        | 0.56        |             |
|                                          | <b>BiteNet R<sup>+</sup> (352)</b> | <b>0.59</b> | <b>0.83</b> | <b>0.57</b> | 0.22        | <b>0.93</b> | <b>0.61</b> | <b>0.83</b> | <b>0.84</b> | <b>0.79</b> | <b>0.25</b> | <b>0.94</b> | 0.06        | 0.98        | <b>0.62</b> |
| BiteNet criterion for training           | Fpocket (352)                      | 0.26        | 0.36        | 0.09        | 0.11        | 0.44        | 0.10        | 0.37        | 0.12        | 0.44        | 0.10        | 0.02        | 0.52        | 0.11        |             |
|                                          | SiteHound (240)                    | 0.30        | 0.40        | 0.14        | 0.14        | 0.58        | 0.17        | 0.42        | 0.16        | 0.59        | 0.18        | 0.01        | 0.79        | 0.18        |             |
|                                          | MetaPocket 2.0 (349)               | 0.28        | 0.40        | 0.11        | 0.12        | 0.50        | 0.13        | 0.40        | 0.13        | 0.50        | 0.13        | 0.06        | 0.57        | 0.14        |             |
|                                          | DeepSite (352)                     | 0.25        | 0.35        | 0.13        | 0.11        | 0.40        | 0.13        | 0.35        | 0.12        | 0.40        | 0.13        | 0.10        | 0.40        | 0.13        |             |
|                                          | P2Rank (352)                       | 0.38        | 0.53        | 0.20        | 0.15        | 0.57        | 0.20        | 0.54        | 0.16        | 0.57        | 0.20        | 0.06        | 0.59        | 0.20        |             |
|                                          | <b>BiteNet (352)</b>               | 0.50        | 0.70        | 0.40        | <b>0.21</b> | 0.78        | 0.43        | 0.70        | 0.21        | 0.78        | 0.43        | <b>0.13</b> | 0.81        | 0.43        |             |
|                                          | <b>BiteNet R<sup>+</sup> (352)</b> | <b>0.50</b> | <b>0.71</b> | <b>0.45</b> | 0.19        | <b>0.80</b> | <b>0.48</b> | <b>0.71</b> | <b>0.72</b> | <b>0.62</b> | <b>0.21</b> | <b>0.81</b> | 0.05        | <b>0.85</b> | <b>0.48</b> |
| P2Rank binding site filtering criterion  | Fpocket (352)                      | 231         | 121         | 256         | 337         | 717         | 185         | 262         | 241         | 223         | 352         | 840         | 457         | 4879        |             |
|                                          | SiteHound (240)                    | 139         | 101         | 197         | 242         | 478         | 125         | 165         | 185         | 163         | 254         | 576         | 114         | 501         |             |
|                                          | MetaPocket 2.0 (349)               | 254         | 95          | 223         | 348         | 699         | 158         | 278         | 223         | 197         | 365         | 824         | 146         | 448         |             |
|                                          | DeepSite (352)                     | 228         | 122         | 268         | 305         | 604         | 222         | 250         | 211         | 252         | 306         | 642         | 221         | 311         |             |
|                                          | P2Rank (352)                       | 285         | 65          | 192         | 349         | 635         | 151         | 307         | 169         | 169         | 358         | 721         | 142         | 388         |             |
|                                          | BiteNet (352)                      | 301         | 51          | <b>176</b>  | 407         | <b>527</b>  | 117         | 334         | <b>146</b>  | 141         | 418         | <b>592</b>  | 107         | 458         |             |
|                                          | <b>BiteNet R<sup>+</sup> (352)</b> | <b>303</b>  | <b>49</b>   | 177         | <b>438</b>  | 612         | <b>113</b>  | <b>341</b>  | 163         | <b>137</b>  | <b>454</b>  | 743         | <b>98</b>   | <b>590</b>  | 3598        |
| BiteNet binding site filtering criterion | Fpocket (352)                      | 169         | 183         | 82          | 229         | 825         | 52          | 172         | 80          | 79          | 230         | 724         | 52          | 303         |             |
|                                          | SiteHound (240)                    | 103         | 137         | 75          | 169         | 551         | 35          | 108         | 70          | 68          | 173         | 485         | 32          | 325         |             |
|                                          | MetaPocket 2.0 (349)               | 179         | 170         | 68          | 237         | 810         | 31          | 180         | 70          | 67          | 237         | 711         | 31          | 297         |             |
|                                          | DeepSite (352)                     | 158         | 192         | 93          | 202         | 707         | 69          | 160         | 91          | 93          | 202         | 639         | 69          | 206         |             |
|                                          | P2Rank (352)                       | 203         | 147         | 46          | 238         | 746         | 28          | 205         | 45          | 44          | 240         | 665         | 27          | 262         |             |
|                                          | BiteNet (352)                      | 206         | 146         | 45          | 266         | <b>668</b>  | 22          | 210         | 42          | 42          | 267         | <b>589</b>  | 21          | 297         |             |
|                                          | <b>BiteNet R<sup>+</sup> (352)</b> | <b>208</b>  | <b>144</b>  | <b>42</b>   | <b>283</b>  | 767         | <b>17</b>   | <b>211</b>  | <b>41</b>   | <b>40</b>   | <b>286</b>  | 664         | <b>14</b>   | <b>393</b>  | 3795        |
| BiteNet criterion for training           | Fpocket (352)                      | 91          | 261         | 161         | 111         | 943         | 141         | 92          | 160         | 160         | 111         | 843         | 141         | 132         |             |
|                                          | SiteHound (240)                    | 71          | 169         | 107         | 104         | 616         | 74          | 75          | 103         | 103         | 105         | 553         | 73          | 140         |             |
|                                          | MetaPocket 2.0 (349)               | 99          | 250         | 150         | 124         | 923         | 126         | 99          | 151         | 150         | 124         | 824         | 126         | 147         |             |
|                                          | DeepSite (352)                     | 89          | 261         | 163         | 106         | 803         | 151         | 89          | 162         | 163         | 106         | 735         | 151         | 108         |             |
|                                          | P2Rank (352)                       | 133         | 217         | 119         | 144         | 840         | 109         | 134         | 116         | 118         | 144         | 761         | 109         | 149         |             |
|                                          | BiteNet (352)                      | 176         | 176         | 75          | 196         | <b>738</b>  | 55          | 177         | 75          | 74          | 196         | <b>660</b>  | 55          | 202         |             |
|                                          | <b>BiteNet R<sup>+</sup> (352)</b> | <b>177</b>  | <b>175</b>  | <b>73</b>   | <b>200</b>  | 850         | <b>50</b>   | <b>179</b>  | <b>73</b>   | <b>71</b>   | <b>202</b>  | 748         | <b>48</b>   | <b>212</b>  | 3976        |

The best score values are denoted with bold font. Top TP, FP, FN scores apply only to methods assessed on the same set of proteins as BiteNet.

Supplementary Table 8: Performance metrics on the HOLO4K subset of 4169 proteins, which are not in the BiteNet training set and each structure contains at least one relevant binding site according to the P2Rank binding site filtering criterion.

| Criterion                                | Method                              | Top-1       |             | Top-3       |             | Top-n       |             | Top-(n+2)   |             | All         |             |             |              |             |              |      |
|------------------------------------------|-------------------------------------|-------------|-------------|-------------|-------------|-------------|-------------|-------------|-------------|-------------|-------------|-------------|--------------|-------------|--------------|------|
|                                          |                                     | prec        | rec         | ap          | prec        | rec         | ap          | prec        | rec         | ap          | prec        | rec         | ap           |             |              |      |
| P2Rank binding site filtering criterion  | Fpocket (3687)                      | 0.62        | 0.29        | 0.19        | 0.37        | 0.51        | 0.31        | 0.47        | 0.52        | 0.33        | 0.31        | 0.63        | 0.36         | 0.06        | 0.78         | 0.38 |
|                                          | SiteHound (2655)                    | 0.56        | 0.28        | 0.15        | 0.33        | 0.50        | 0.22        | 0.43        | 0.52        | 0.24        | 0.30        | 0.64        | 0.26         | 0.02        | <b>0.97</b>  | 0.29 |
|                                          | MetaPocket 2.0 (2359)               | 0.65        | 0.38        | 0.23        | 0.35        | 0.62        | 0.37        | 0.52        | 0.58        | 0.36        | 0.31        | 0.69        | 0.40         | 0.20        | 0.73         | 0.41 |
|                                          | DeepSite (3669)                     | 0.70        | 0.33        | 0.24        | 0.43        | 0.48        | 0.31        | 0.62        | 0.47        | 0.33        | 0.41        | 0.49        | 0.31         | <b>0.37</b> | 0.49         | 0.31 |
|                                          | P2Rank (4169)                       | 0.82        | 0.40        | 0.31        | 0.46        | 0.65        | 0.50        | 0.61        | 0.69        | 0.54        | <b>0.37</b> | 0.75        | 0.56         | 0.13        | 0.79         | 0.56 |
|                                          | <b>BiteNet R<sup>+</sup> (4169)</b> | 0.91        | <b>0.42</b> | 0.41        | <b>0.57</b> | 0.70        | 0.66        | <b>0.76</b> | 0.79        | 0.75        | <b>0.48</b> | 0.84        | 0.77         | 0.29        | 0.86         | 0.77 |
| <b>BiteNet R<sup>+</sup> (4169)</b>      | <b>0.92</b>                         | 0.42        | <b>0.41</b> | 0.52        | <b>0.71</b> | <b>0.67</b> | 0.75        | <b>0.81</b> | <b>0.77</b> | 0.43        | <b>0.86</b> | <b>0.78</b> | 0.14         | 0.90        | <b>0.79</b>  |      |
| BiteNet binding site filtering criterion | Fpocket (3687)                      | 0.40        | 0.34        | 0.14        | 0.24        | 0.59        | 0.22        | 0.51        | 0.53        | 0.31        | 0.25        | 0.68        | 0.25         | 0.04        | 0.85         | 0.26 |
|                                          | SiteHound (2655)                    | 0.38        | 0.33        | 0.12        | 0.23        | 0.57        | 0.17        | 0.48        | 0.51        | 0.24        | 0.25        | 0.69        | 0.21         | 0.01        | <b>1.00</b>  | 0.22 |
|                                          | MetaPocket 2.0 (2359)               | 0.47        | 0.47        | 0.20        | 0.24        | 0.73        | 0.30        | 0.61        | 0.64        | 0.40        | 0.26        | 0.79        | 0.33         | 0.13        | 0.84         | 0.33 |
|                                          | DeepSite (3669)                     | 0.47        | 0.39        | 0.19        | 0.28        | 0.55        | 0.24        | 0.66        | 0.53        | 0.36        | 0.30        | 0.56        | 0.25         | <b>0.24</b> | 0.56         | 0.24 |
|                                          | P2Rank (4169)                       | 0.56        | 0.48        | 0.26        | 0.30        | 0.75        | 0.40        | 0.73        | 0.77        | 0.61        | 0.31        | 0.83        | 0.46         | 0.08        | 0.88         | 0.44 |
|                                          | <b>BiteNet R<sup>+</sup> (4169)</b> | 0.62        | <b>0.51</b> | 0.36        | <b>0.37</b> | 0.82        | 0.57        | <b>0.85</b> | 0.87        | 0.82        | <b>0.39</b> | 0.94        | 0.65         | 0.18        | 0.97         | 0.64 |
| <b>BiteNet R<sup>+</sup> (4169)</b>      | <b>0.62</b>                         | 0.51        | <b>0.38</b> | 0.34        | <b>0.83</b> | <b>0.60</b> | 0.86        | <b>0.88</b> | <b>0.85</b> | <b>0.85</b> | <b>0.95</b> | <b>0.69</b> | 0.08         | 0.99        | <b>0.68</b>  |      |
| BiteNet criterion for training           | Fpocket (3687)                      | 0.22        | 0.18        | 0.04        | 0.13        | 0.31        | 0.06        | 0.28        | 0.28        | 0.08        | 0.14        | 0.36        | 0.07         | 0.02        | 0.47         | 0.07 |
|                                          | SiteHound (2655)                    | 0.26        | 0.21        | 0.05        | 0.16        | 0.39        | 0.08        | 0.33        | 0.33        | 0.10        | 0.17        | 0.46        | 0.09         | 0.01        | 0.78         | 0.10 |
|                                          | MetaPocket 2.0 (2359)               | 0.26        | 0.25        | 0.05        | 0.14        | 0.40        | 0.08        | 0.33        | 0.33        | 0.10        | 0.15        | 0.44        | 0.09         | 0.08        | 0.50         | 0.10 |
|                                          | DeepSite (3669)                     | 0.28        | 0.22        | 0.06        | 0.16        | 0.30        | 0.07        | 0.37        | 0.29        | 0.11        | 0.17        | 0.30        | 0.07         | 0.14        | 0.30         | 0.07 |
|                                          | P2Rank (4169)                       | 0.36        | 0.29        | 0.08        | 0.19        | 0.44        | 0.12        | 0.45        | 0.45        | 0.18        | 0.19        | 0.49        | 0.14         | 0.05        | 0.52         | 0.13 |
|                                          | <b>BiteNet R<sup>+</sup> (4169)</b> | 0.55        | 0.45        | 0.29        | <b>0.33</b> | 0.71        | 0.46        | 0.75        | 0.75        | 0.65        | <b>0.34</b> | 0.81        | 0.52         | <b>0.16</b> | 0.84         | 0.51 |
| <b>BiteNet R<sup>+</sup> (4169)</b>      | <b>0.56</b>                         | <b>0.45</b> | <b>0.31</b> | <b>0.30</b> | <b>0.73</b> | <b>0.51</b> | <b>0.76</b> | <b>0.77</b> | <b>0.69</b> | <b>0.32</b> | <b>0.83</b> | <b>0.57</b> | 0.08         | <b>0.86</b> | <b>0.56</b>  |      |
| P2Rank binding site filtering criterion  | Fpocket (3687)                      | 2297        | 1390        | 6156        | 4374        | 6661        | 4221        | 4215        | 4434        | 4144        | 5454        | 10520       | 3210         | 8082        | 90636        | 1905 |
|                                          | SiteHound (2655)                    | 1492        | 1163        | 4445        | 3102        | 4863        | 3089        | 2870        | 3285        | 2985        | 4095        | 7370        | 2218         | 9601        | 252876       | 174  |
|                                          | MetaPocket 2.0 (2359)               | 1544        | 815         | 2824        | 2691        | 4386        | 1752        | 2387        | 2047        | 1907        | 3114        | 5828        | 1430         | 3653        | 11423        | 1235 |
|                                          | DeepSite (3669)                     | 2570        | 1096        | 5766        | 3906        | 4892        | 4452        | 3633        | 2170        | 4558        | 3969        | 5216        | 4382         | 3988        | 6280         | 4374 |
|                                          | P2Rank (4169)                       | 3410        | 758         | 5860        | 5663        | 6449        | 3452        | 5967        | 3686        | 2988        | 6658        | 10715       | 2466         | 7563        | 44345        | 2022 |
|                                          | <b>BiteNet R<sup>+</sup> (4169)</b> | 3806        | 363         | <b>5638</b> | 6736        | <b>4419</b> | 2912        | 7439        | <b>1950</b> | 2040        | 8490        | <b>7213</b> | 1587         | 9473        | <b>17044</b> | 1334 |
| <b>BiteNet R<sup>+</sup> (4169)</b>      | <b>3832</b>                         | <b>337</b>  | 5652        | <b>7058</b> | 5347        | <b>2858</b> | <b>7718</b> | 2026        | <b>1875</b> | <b>1875</b> | 8856        | <b>1413</b> | <b>11854</b> | 46832       | <b>977</b>   |      |
| BiteNet binding site filtering criterion | Fpocket (3687)                      | 1480        | 2207        | 3049        | 2793        | 8242        | 1896        | 2367        | 2218        | 2147        | 3256        | 8682        | 1476         | 5056        | 93662        | 670  |
|                                          | SiteHound (2655)                    | 1015        | 1640        | 2198        | 2069        | 5896        | 1393        | 1610        | 1648        | 1587        | 2490        | 6078        | 1020         | 6057        | 256420       | 2    |
|                                          | MetaPocket 2.0 (2359)               | 1104        | 1255        | 1320        | 1841        | 5236        | 674         | 1509        | 954         | 896         | 2047        | 5082        | 526          | 2445        | 12631        | 400  |
|                                          | DeepSite (3669)                     | 1739        | 1927        | 2765        | 2561        | 6237        | 2040        | 2330        | 1205        | 2142        | 2594        | 5714        | 2005         | 2610        | 7658         | 1999 |
|                                          | P2Rank (4169)                       | 2352        | 1816        | 2685        | 3753        | 8359        | 1301        | 3782        | 1380        | 1196        | 4235        | 8946        | 862          | 4777        | 47131        | 645  |
|                                          | <b>BiteNet R<sup>+</sup> (4169)</b> | 2583        | 1586        | <b>2517</b> | 4417        | <b>6738</b> | 915         | 4451        | 697         | 655         | 5244        | <b>6992</b> | 302          | 5978        | <b>20539</b> | 151  |
| <b>BiteNet R<sup>+</sup> (4169)</b>      | <b>2593</b>                         | <b>1576</b> | 2522        | <b>4585</b> | 7820        | <b>898</b>  | <b>4510</b> | <b>662</b>  | <b>604</b>  | <b>5456</b> | 7982        | <b>802</b>  | <b>7511</b>  | 51175       | <b>69</b>    |      |
| BiteNet criterion for training           | Fpocket (3687)                      | 811         | 2876        | 3779        | 1430        | 9605        | 3157        | 1270        | 3326        | 3315        | 1664        | 10285       | 2921         | 2139        | 96579        | 2454 |
|                                          | SiteHound (2655)                    | 686         | 1969        | 2575        | 1275        | 6690        | 1991        | 1079        | 2187        | 2180        | 1503        | 7073        | 1760         | 2549        | 259928       | 724  |
|                                          | MetaPocket 2.0 (2359)               | 622         | 1737        | 1858        | 984         | 6093        | 1498        | 818         | 1655        | 1661        | 1102        | 6037        | 1381         | 1259        | 13817        | 1249 |
|                                          | DeepSite (3669)                     | 1011        | 2655        | 3564        | 1420        | 7378        | 3202        | 1311        | 2233        | 3265        | 1431        | 6880        | 3191         | 1436        | 8832         | 3188 |
|                                          | P2Rank (4169)                       | 1483        | 2685        | 3690        | 2251        | 9861        | 2916        | 2329        | 2845        | 2832        | 2542        | 10648       | 2620         | 2681        | 49227        | 2487 |
|                                          | <b>BiteNet R<sup>+</sup> (4169)</b> | 2304        | 1865        | 2869        | 3675        | <b>7480</b> | 1493        | 3856        | 1303        | 1310        | 4174        | <b>8067</b> | 992          | 4315        | <b>22202</b> | 851  |
| <b>BiteNet R<sup>+</sup> (4169)</b>      | <b>2319</b>                         | <b>1850</b> | <b>2854</b> | <b>3776</b> | 8629        | <b>1392</b> | <b>3952</b> | <b>1232</b> | <b>1214</b> | <b>4262</b> | 9188        | <b>904</b>  | <b>4445</b>  | 54241       | <b>721</b>   |      |

The best score values are denoted with bold font. Top TP, FP, FN scores apply only to methods assessed on the same set of proteins as BiteNet.

Supplementary Table 9: Performance metrics on the COACH420 subset of 344 proteins, which are not in both BiteNet training and validation set and each structure contains at least one relevant binding site according to the P2Rank binding site filtering criterion.

| Criterion                                | Method                  | Top-1       |             |             | Top-3       |             |             | Top-n       |             |             | Top-(n+2)   |             |             | All         |             |             |
|------------------------------------------|-------------------------|-------------|-------------|-------------|-------------|-------------|-------------|-------------|-------------|-------------|-------------|-------------|-------------|-------------|-------------|-------------|
|                                          |                         | prec        | rec         | ap          | prec        | rec         | ap          | prec        | rec         | ap          | prec        | rec         | ap          | prec        | rec         | ap          |
| P2Rank binding site filtering criterion  | Fpocket (344)           | 0.65        | 0.49        | 0.37        | 0.28        | 0.64        | 0.43        | 0.51        | 0.56        | 0.41        | 0.26        | 0.67        | 0.44        | 0.07        | 0.76        | 0.45        |
|                                          | SiteHound (237)         | 0.57        | 0.43        | 0.28        | 0.28        | 0.64        | 0.32        | 0.46        | 0.53        | 0.32        | 0.26        | 0.67        | 0.33        | 0.02        | <b>0.94</b> | 0.33        |
|                                          | MetaPocket 2.0 (341)    | 0.72        | 0.56        | 0.44        | 0.30        | 0.69        | 0.51        | 0.55        | 0.61        | 0.48        | 0.27        | 0.71        | 0.52        | 0.16        | 0.76        | 0.53        |
|                                          | DeepSite (344)          | 0.66        | 0.48        | 0.38        | 0.31        | 0.57        | 0.39        | 0.54        | 0.51        | 0.39        | 0.30        | 0.57        | 0.39        | <b>0.26</b> | 0.57        | 0.39        |
|                                          | P2Rank (344)            | 0.82        | 0.62        | 0.53        | 0.33        | 0.70        | 0.54        | 0.64        | 0.67        | 0.55        | 0.31        | 0.72        | 0.55        | 0.15        | 0.74        | 0.54        |
|                                          | <b>BiteNet (344)</b>    | 0.85        | <b>0.65</b> | 0.61        | <b>0.38</b> | 0.77        | 0.68        | <b>0.69</b> | 0.72        | 0.66        | <b>0.36</b> | 0.79        | 0.69        | 0.23        | 0.81        | 0.69        |
|                                          | <b>BiteNet R+ (344)</b> | <b>0.86</b> | 0.65        | <b>0.61</b> | 0.34        | <b>0.78</b> | <b>0.69</b> | 0.66        | <b>0.73</b> | <b>0.67</b> | 0.31        | <b>0.80</b> | <b>0.70</b> | 0.09        | 0.85        | <b>0.71</b> |
| BiteNet binding site filtering criterion | Fpocket (344)           | 0.47        | 0.67        | 0.35        | 0.19        | 0.80        | 0.38        | 0.68        | 0.68        | 0.52        | 0.21        | 0.80        | 0.38        | 0.04        | 0.92        | 0.39        |
|                                          | SiteHound (237)         | 0.42        | 0.57        | 0.30        | 0.20        | 0.80        | 0.33        | 0.60        | 0.61        | 0.43        | 0.22        | 0.82        | 0.34        | 0.01        | <b>0.99</b> | 0.32        |
|                                          | MetaPocket 2.0 (341)    | 0.51        | 0.73        | 0.40        | 0.21        | 0.88        | 0.46        | 0.72        | 0.73        | 0.60        | 0.23        | 0.88        | 0.47        | 0.10        | 0.93        | 0.47        |
|                                          | DeepSite (344)          | 0.46        | 0.65        | 0.38        | 0.21        | 0.74        | 0.37        | 0.65        | 0.65        | 0.50        | 0.23        | 0.74        | 0.38        | <b>0.18</b> | 0.75        | 0.37        |
|                                          | P2Rank (344)            | 0.58        | 0.82        | 0.48        | 0.22        | 0.89        | 0.48        | 0.82        | 0.83        | 0.70        | 0.24        | 0.89        | 0.48        | 0.10        | 0.92        | 0.48        |
|                                          | <b>BiteNet (344)</b>    | 0.58        | 0.82        | 0.52        | <b>0.24</b> | 0.91        | 0.55        | 0.83        | 0.84        | 0.78        | <b>0.27</b> | 0.92        | 0.55        | 0.15        | 0.95        | 0.56        |
|                                          | <b>BiteNet R+ (344)</b> | <b>0.59</b> | <b>0.84</b> | <b>0.57</b> | 0.22        | <b>0.93</b> | <b>0.61</b> | <b>0.84</b> | <b>0.84</b> | <b>0.79</b> | 0.25        | <b>0.95</b> | <b>0.61</b> | 0.06        | 0.99        | <b>0.61</b> |
| BiteNet criterion for training           | Fpocket (344)           | 0.25        | 0.35        | 0.08        | 0.10        | 0.43        | 0.10        | 0.35        | 0.35        | 0.12        | 0.11        | 0.43        | 0.10        | 0.02        | 0.51        | 0.10        |
|                                          | SiteHound (237)         | 0.29        | 0.39        | 0.13        | 0.14        | 0.58        | 0.17        | 0.41        | 0.41        | 0.20        | 0.16        | 0.58        | 0.17        | 0.01        | 0.78        | 0.17        |
|                                          | MetaPocket 2.0 (341)    | 0.28        | 0.39        | 0.11        | 0.12        | 0.49        | 0.13        | 0.39        | 0.39        | 0.16        | 0.13        | 0.49        | 0.13        | 0.06        | 0.57        | 0.14        |
|                                          | DeepSite (344)          | 0.26        | 0.36        | 0.13        | 0.12        | 0.41        | 0.14        | 0.37        | 0.36        | 0.17        | 0.13        | 0.41        | 0.14        | 0.10        | 0.42        | 0.14        |
|                                          | P2Rank (344)            | 0.37        | 0.52        | 0.20        | 0.14        | 0.56        | 0.20        | 0.53        | 0.53        | 0.29        | 0.16        | 0.56        | 0.20        | 0.06        | 0.58        | 0.20        |
|                                          | <b>BiteNet (344)</b>    | 0.49        | 0.70        | 0.40        | <b>0.21</b> | 0.78        | 0.42        | 0.70        | 0.70        | 0.59        | <b>0.23</b> | 0.78        | 0.42        | <b>0.12</b> | 0.80        | 0.43        |
|                                          | <b>BiteNet R+ (344)</b> | <b>0.50</b> | <b>0.71</b> | <b>0.45</b> | 0.19        | <b>0.80</b> | <b>0.48</b> | <b>0.71</b> | <b>0.72</b> | <b>0.62</b> | 0.21        | <b>0.81</b> | <b>0.48</b> | 0.05        | <b>0.85</b> | <b>0.49</b> |
| P2Rank binding site filtering criterion  | Fpocket (344)           | 224         | 120         | 252         | 330         | 700         | 181         | 255         | 237         | 219         | 345         | 820         | 166         | 448         | 4773        | 119         |
|                                          | SiteHound (237)         | 136         | 101         | 197         | 239         | 472         | 125         | 162         | 185         | 163         | 251         | 570         | 114         | 498         | 14175       | 22          |
|                                          | MetaPocket 2.0 (341)    | 247         | 94          | 219         | 341         | 682         | 154         | 271         | 219         | 193         | 358         | 804         | 142         | 441         | 1719        | 117         |
|                                          | DeepSite (344)          | 227         | 115         | 258         | 302         | 584         | 214         | 248         | 203         | 243         | 303         | 622         | 213         | 307         | <b>759</b>  | 212         |
|                                          | P2Rank (344)            | 279         | 63          | 188         | 342         | 619         | 148         | 301         | 164         | 165         | 351         | 704         | 139         | 381         | 1907        | 129         |
|                                          | BiteNet (344)           | 294         | 50          | <b>172</b>  | 398         | <b>514</b>  | 114         | 326         | <b>143</b>  | 138         | 408         | <b>578</b>  | 105         | 448         | 1127        | 95          |
|                                          | <b>BiteNet R+ (344)</b> | <b>296</b>  | <b>48</b>   | 173         | <b>430</b>  | 596         | <b>110</b>  | <b>333</b>  | 160         | <b>134</b>  | <b>444</b>  | 726         | <b>97</b>   | <b>575</b>  | 3503        | <b>74</b>   |
| BiteNet binding site filtering criterion | Fpocket (344)           | 163         | 181         | 80          | 223         | 807         | 50          | 166         | 78          | 77          | 224         | 706         | 50          | 295         | 4926        | 20          |
|                                          | SiteHound (237)         | 100         | 137         | 75          | 166         | 545         | 35          | 105         | 70          | 68          | 170         | 479         | 32          | 322         | 14351       | 1           |
|                                          | MetaPocket 2.0 (341)    | 173         | 168         | 66          | 231         | 792         | 29          | 174         | 68          | 65          | 231         | 693         | 29          | 291         | 1869        | 18          |
|                                          | DeepSite (344)          | 157         | 185         | 86          | 200         | 686         | 63          | 159         | 84          | 86          | 200         | 618         | 63          | 203         | <b>863</b>  | 62          |
|                                          | P2Rank (344)            | 197         | 145         | 44          | 231         | 730         | 27          | 199         | 43          | 42          | 233         | 649         | 26          | 255         | 2033        | 20          |
|                                          | BiteNet (344)           | 200         | 144         | 43          | 258         | <b>654</b>  | 21          | 204         | 40          | 40          | 259         | <b>575</b>  | 20          | 289         | 1286        | 12          |
|                                          | <b>BiteNet R+ (344)</b> | <b>202</b>  | <b>142</b>  | <b>40</b>   | <b>276</b>  | 750         | <b>16</b>   | <b>205</b>  | <b>39</b>   | <b>38</b>   | <b>279</b>  | 647         | <b>13</b>   | <b>381</b>  | 3697        | <b>3</b>    |
| BiteNet criterion for training           | Fpocket (344)           | 85          | 259         | 159         | 105         | 925         | 139         | 86          | 158         | 158         | 105         | 825         | 139         | 124         | 5097        | 120         |
|                                          | SiteHound (237)         | 68          | 169         | 107         | 101         | 610         | 74          | 72          | 103         | 103         | 102         | 547         | 73          | 137         | 14536       | 38          |
|                                          | MetaPocket 2.0 (341)    | 94          | 247         | 147         | 119         | 904         | 123         | 94          | 148         | 147         | 119         | 805         | 123         | 142         | 2018        | 104         |
|                                          | DeepSite (344)          | 89          | 253         | 155         | 106         | 780         | 143         | 89          | 154         | 155         | 106         | 712         | 143         | 108         | <b>958</b>  | 142         |
|                                          | P2Rank (344)            | 128         | 214         | 116         | 138         | 823         | 107         | 129         | 113         | 115         | 138         | 744         | 107         | 143         | 2145        | 102         |
|                                          | BiteNet (344)           | 170         | 174         | 73          | 189         | <b>723</b>  | 54          | 171         | 73          | 72          | 189         | <b>645</b>  | 54          | 195         | 1380        | 48          |
|                                          | <b>BiteNet R+ (344)</b> | <b>172</b>  | <b>172</b>  | <b>70</b>   | <b>194</b>  | 832         | <b>48</b>   | <b>174</b>  | <b>70</b>   | <b>68</b>   | <b>196</b>  | 730         | <b>46</b>   | <b>206</b>  | 3872        | <b>36</b>   |

The best score values are denoted with bold font. Top TP, FP, FN scores apply only to methods assessed on the same set of proteins as BiteNet.

Supplementary Table 10: Performance metrics on the HOLO4K subset of 4121 proteins, which are not in BiteNet training and validation sets and each structure contains at least one relevant binding site according to the P2Rank binding site filtering criterion.

| Criterion                                | Method                | Top-1       |             | Top-3       |             | Top-n       |             | Top-(n+2)   |             | All         |             |             |              |             |              |      |
|------------------------------------------|-----------------------|-------------|-------------|-------------|-------------|-------------|-------------|-------------|-------------|-------------|-------------|-------------|--------------|-------------|--------------|------|
|                                          |                       | prec        | rec         | ap          | prec        | rec         | ap          | prec        | rec         | ap          | prec        | rec         | ap           |             |              |      |
| P2Rank binding site filtering criterion  | Fpocket (3649)        | 0.62        | 0.29        | 0.19        | 0.37        | 0.52        | 0.31        | 0.48        | 0.52        | 0.33        | 0.31        | 0.63        | 0.36         | 0.06        | 0.78         | 0.38 |
|                                          | SiteHound (2628)      | 0.57        | 0.28        | 0.15        | 0.34        | 0.50        | 0.23        | 0.44        | 0.52        | 0.24        | 0.30        | 0.64        | 0.26         | 0.02        | <b>0.97</b>  | 0.29 |
|                                          | MetaPocket 2.0 (2334) | 0.66        | 0.38        | 0.24        | 0.35        | 0.62        | 0.37        | 0.53        | 0.58        | 0.36        | 0.31        | 0.69        | 0.40         | 0.20        | 0.73         | 0.41 |
|                                          | DeepSite (3631)       | 0.70        | 0.33        | 0.24        | 0.43        | 0.49        | 0.31        | 0.62        | 0.48        | 0.33        | 0.42        | 0.50        | 0.32         | <b>0.37</b> | 0.50         | 0.32 |
|                                          | P2Rank (4121)         | 0.82        | 0.40        | 0.32        | 0.46        | 0.65        | 0.50        | 0.61        | 0.70        | 0.55        | <b>0.47</b> | 0.75        | 0.56         | 0.13        | 0.80         | 0.57 |
|                                          | <b>BiteNet (4121)</b> | 0.91        | <b>0.42</b> | 0.41        | <b>0.57</b> | 0.70        | 0.66        | <b>0.76</b> | 0.79        | 0.75        | <b>0.48</b> | 0.84        | 0.77         | 0.29        | 0.87         | 0.77 |
| <b>BiteNet R+ (4121)</b>                 | <b>0.92</b>           | 0.42        | <b>0.41</b> | 0.52        | <b>0.71</b> | <b>0.67</b> | 0.75        | <b>0.81</b> | <b>0.77</b> | 0.43        | <b>0.86</b> | <b>0.78</b> | 0.14         | 0.90        | <b>0.79</b>  |      |
| BiteNet binding site filtering criterion | Fpocket (3649)        | 0.40        | 0.34        | 0.14        | 0.23        | 0.59        | 0.22        | 0.51        | 0.53        | 0.32        | 0.25        | 0.68        | 0.25         | 0.04        | 0.86         | 0.26 |
|                                          | SiteHound (2628)      | 0.38        | 0.33        | 0.12        | 0.23        | 0.58        | 0.17        | 0.49        | 0.52        | 0.24        | 0.25        | 0.69        | 0.21         | 0.01        | <b>1.00</b>  | 0.22 |
|                                          | MetaPocket 2.0 (2334) | 0.47        | 0.47        | 0.20        | 0.24        | 0.73        | 0.31        | 0.61        | 0.64        | 0.40        | 0.26        | 0.79        | 0.33         | 0.13        | 0.84         | 0.33 |
|                                          | DeepSite (3631)       | 0.47        | 0.40        | 0.20        | 0.28        | 0.56        | 0.24        | 0.66        | 0.53        | 0.37        | 0.30        | 0.56        | 0.25         | <b>0.24</b> | 0.57         | 0.24 |
|                                          | P2Rank (4121)         | 0.56        | 0.48        | 0.26        | 0.30        | 0.75        | 0.40        | 0.73        | 0.77        | 0.61        | 0.31        | 0.83        | 0.46         | 0.08        | 0.88         | 0.44 |
|                                          | <b>BiteNet (4121)</b> | 0.62        | <b>0.51</b> | 0.36        | <b>0.37</b> | 0.82        | 0.56        | 0.85        | 0.87        | 0.82        | <b>0.38</b> | 0.94        | 0.65         | 0.18        | 0.97         | 0.64 |
| <b>BiteNet R+ (4121)</b>                 | <b>0.62</b>           | 0.51        | <b>0.38</b> | 0.33        | <b>0.83</b> | <b>0.60</b> | <b>0.86</b> | <b>0.88</b> | <b>0.85</b> | 0.35        | <b>0.95</b> | <b>0.69</b> | 0.08         | 0.99        | <b>0.68</b>  |      |
| BiteNet criterion for training           | Fpocket (3649)        | 0.22        | 0.18        | 0.04        | 0.13        | 0.31        | 0.06        | 0.28        | 0.28        | 0.08        | 0.14        | 0.37        | 0.07         | 0.02        | 0.47         | 0.07 |
|                                          | SiteHound (2628)      | 0.26        | 0.21        | 0.05        | 0.16        | 0.40        | 0.08        | 0.33        | 0.34        | 0.10        | 0.18        | 0.47        | 0.09         | 0.01        | 0.78         | 0.10 |
|                                          | MetaPocket 2.0 (2334) | 0.26        | 0.25        | 0.06        | 0.14        | 0.40        | 0.09        | 0.33        | 0.33        | 0.11        | 0.15        | 0.45        | 0.10         | 0.08        | 0.50         | 0.10 |
|                                          | DeepSite (3631)       | 0.28        | 0.22        | 0.06        | 0.16        | 0.30        | 0.07        | 0.37        | 0.29        | 0.11        | 0.17        | 0.31        | 0.07         | 0.14        | 0.31         | 0.07 |
|                                          | P2Rank (4121)         | 0.36        | 0.29        | 0.08        | 0.19        | 0.44        | 0.12        | 0.45        | 0.46        | 0.19        | 0.19        | 0.50        | 0.14         | 0.05        | 0.52         | 0.13 |
|                                          | <b>BiteNet (4121)</b> | 0.55        | 0.45        | 0.29        | <b>0.33</b> | 0.71        | 0.46        | 0.75        | 0.75        | 0.65        | <b>0.34</b> | 0.81        | 0.52         | <b>0.16</b> | 0.84         | 0.51 |
| <b>BiteNet R+ (4121)</b>                 | <b>0.55</b>           | <b>0.45</b> | <b>0.31</b> | <b>0.30</b> | <b>0.73</b> | <b>0.50</b> | <b>0.76</b> | <b>0.77</b> | <b>0.69</b> | 0.32        | <b>0.83</b> | <b>0.57</b> | 0.08         | <b>0.86</b> | <b>0.56</b>  |      |
| P2Rank binding site filtering criterion  | Fpocket (3649)        | 2277        | 1372        | 6053        | 4332        | 6590        | 4142        | 4169        | 4355        | 4070        | 5399        | 10375       | 3144         | 7994        | 89297        | 1858 |
|                                          | SiteHound (2628)      | 1486        | 1142        | 4354        | 3087        | 4797        | 3007        | 2849        | 3208        | 2913        | 4064        | 7249        | 2156         | 9478        | 249053       | 161  |
|                                          | MetaPocket 2.0 (2334) | 1534        | 800         | 2788        | 2671        | 4331        | 1728        | 2371        | 2015        | 1879        | 3093        | 5752        | 1405         | 3630        | 11285        | 1211 |
|                                          | DeepSite (3631)       | 2549        | 1079        | 5664        | 3874        | 4839        | 4361        | 3605        | 2140        | 4465        | 3937        | 5161        | 4291         | 3956        | 6218         | 4283 |
|                                          | P2Rank (4121)         | 3375        | 745         | 5753        | 5596        | 6376        | 3383        | 5893        | 3616        | 2933        | 6577        | 10562       | 2415         | 7481        | 43588        | 1972 |
|                                          | <b>BiteNet (4121)</b> | 3759        | 362         | <b>5542</b> | 6642        | <b>4375</b> | 2857        | 7336        | <b>1919</b> | 2001        | 8373        | <b>7118</b> | 1551         | 9348        | <b>16820</b> | 1299 |
| <b>BiteNet R+ (4121)</b>                 | <b>3785</b>           | <b>336</b>  | 5556        | <b>6965</b> | 5296        | <b>2807</b> | <b>7619</b> | 1988        | <b>1834</b> | <b>8933</b> | 8744        | <b>1379</b> | <b>11714</b> | 46205       | <b>947</b>   |      |
| BiteNet binding site filtering criterion | Fpocket (3649)        | 1461        | 2188        | 2996        | 2755        | 8167        | 1861        | 2333        | 2179        | 2110        | 3213        | 8577        | 1446         | 4984        | 92307        | 654  |
|                                          | SiteHound (2628)      | 1009        | 1619        | 2151        | 2054        | 5830        | 1354        | 1599        | 1605        | 1546        | 2466        | 5994        | 988          | 5961        | 252570       | 2    |
|                                          | MetaPocket 2.0 (2334) | 1094        | 1240        | 1290        | 1822        | 5180        | 653         | 1495        | 927         | 872         | 2027        | 5011        | 506          | 2423        | 12492        | 381  |
|                                          | DeepSite (3631)       | 1719        | 1909        | 2712        | 2532        | 6181        | 1994        | 2306        | 1174        | 2093        | 2565        | 5658        | 1959         | 2581        | 7593         | 1953 |
|                                          | P2Rank (4121)         | 2318        | 1802        | 2631        | 3689        | 8283        | 1277        | 3722        | 1353        | 1170        | 4166        | 8836        | 842          | 4706        | 46363        | 627  |
|                                          | <b>BiteNet (4121)</b> | 2539        | 1582        | <b>2475</b> | 4328        | <b>6689</b> | 908         | 4371        | 687         | 646         | 5145        | <b>6913</b> | 299          | 5871        | <b>20297</b> | 150  |
| <b>BiteNet R+ (4121)</b>                 | <b>2549</b>           | <b>1572</b> | 2478        | <b>4499</b> | 7762        | <b>888</b>  | <b>4433</b> | <b>649</b>  | <b>593</b>  | <b>5361</b> | 7891        | <b>274</b>  | <b>7388</b>  | 50531       | <b>69</b>    |      |
| BiteNet criterion for training           | Fpocket (3649)        | 800         | 2849        | 3717        | 1409        | 9513        | 3105        | 1250        | 3273        | 3262        | 1640        | 10161       | 2872         | 2106        | 95185        | 2414 |
|                                          | SiteHound (2628)      | 683         | 1945        | 2524        | 1271        | 6613        | 1941        | 1074        | 2138        | 2131        | 1495        | 6973        | 1714         | 2515        | 256016       | 704  |
|                                          | MetaPocket 2.0 (2334) | 617         | 1717        | 1822        | 973         | 6029        | 1468        | 811         | 1621        | 1627        | 1090        | 5958        | 1352         | 1245        | 13670        | 1222 |
|                                          | DeepSite (3631)       | 1001        | 2627        | 3501        | 1406        | 7307        | 3143        | 1298        | 2191        | 3205        | 1417        | 6809        | 3132         | 1422        | 8752         | 3129 |
|                                          | P2Rank (4121)         | 1465        | 2655        | 3618        | 2216        | 9756        | 2861        | 2296        | 2791        | 2775        | 2503        | 10508       | 2568         | 2640        | 48429        | 2437 |
|                                          | <b>BiteNet (4121)</b> | 2269        | 1852        | 2814        | 3611        | <b>7406</b> | 1467        | 3792        | 1277        | 1284        | 4105        | <b>7958</b> | 971          | 4244        | <b>21924</b> | 832  |
| <b>BiteNet R+ (4121)</b>                 | <b>2280</b>           | <b>1841</b> | <b>2803</b> | <b>3707</b> | 8554        | <b>1371</b> | <b>3885</b> | <b>1209</b> | <b>1191</b> | <b>4187</b> | 9077        | <b>889</b>  | <b>4366</b>  | 53553       | <b>710</b>   |      |

The best score values are denoted with bold font. Top TP, FP, FN scores apply only to methods assessed on the same set of proteins as BiteNet.

Supplementary Table 11: Performance metrics on the COACH420 subset of 238 proteins, which are not in the BiteNet training set and each structure contains at least one relevant binding site according to the P2Rank binding site filtering criterion.

| Criterion                                | Method                  | Top-1       |             | Top-3       |             | Top-n       |             | Top-(n+2)   |             | All         |             |             |             |             |             |             |
|------------------------------------------|-------------------------|-------------|-------------|-------------|-------------|-------------|-------------|-------------|-------------|-------------|-------------|-------------|-------------|-------------|-------------|-------------|
|                                          |                         | prec        | ap          | prec        | ap          | prec        | ap          | prec        | ap          | prec        | ap          |             |             |             |             |             |
| P2Rank binding site filtering criterion  | Fpocket (238)           | 0.72        | 0.61        | 0.47        | 0.29        | 0.74        | 0.52        | 0.64        | 0.65        | 0.50        | 0.28        | 0.75        | 0.53        | 0.07        | 0.86        | 0.54        |
|                                          | SiteHound (167)         | 0.62        | 0.56        | 0.40        | 0.29        | 0.76        | 0.43        | 0.55        | 0.60        | 0.41        | 0.27        | 0.77        | 0.43        | 0.02        | <b>0.96</b> | 0.44        |
|                                          | MetaPocket 2.0 (236)    | 0.79        | 0.68        | 0.58        | 0.32        | 0.82        | 0.66        | 0.68        | 0.70        | 0.59        | 0.30        | 0.82        | 0.66        | 0.16        | 0.86        | 0.67        |
|                                          | DeepSite (238)          | 0.68        | 0.58        | 0.46        | 0.31        | 0.68        | 0.48        | 0.61        | 0.60        | 0.47        | 0.31        | 0.68        | 0.48        | <b>0.26</b> | 0.68        | 0.47        |
|                                          | P2Rank (238)            | 0.87        | 0.76        | 0.67        | 0.33        | 0.83        | 0.67        | 0.75        | 0.78        | 0.68        | 0.32        | 0.84        | 0.67        | <b>0.15</b> | 0.86        | 0.67        |
|                                          | <b>BiteNet (238)</b>    | 0.89        | 0.77        | <b>0.74</b> | <b>0.39</b> | 0.87        | 0.80        | <b>0.80</b> | <b>0.81</b> | <b>0.77</b> | <b>0.38</b> | 0.89        | 0.81        | 0.24        | 0.91        | 0.81        |
|                                          | <b>BiteNet R+ (238)</b> | <b>0.90</b> | <b>0.77</b> | 0.73        | 0.34        | <b>0.87</b> | <b>0.80</b> | 0.78        | 0.81        | 0.77        | 0.33        | <b>0.89</b> | <b>0.81</b> | 0.10        | 0.94        | <b>0.82</b> |
| BiteNet binding site filtering criterion | Fpocket (238)           | 0.71        | 0.67        | 0.51        | 0.28        | 0.79        | 0.55        | 0.68        | 0.69        | 0.52        | 0.27        | 0.79        | 0.55        | 0.06        | 0.92        | 0.58        |
|                                          | SiteHound (167)         | 0.62        | 0.58        | 0.41        | 0.28        | 0.80        | 0.44        | 0.61        | 0.62        | 0.44        | 0.28        | 0.82        | 0.45        | 0.02        | <b>0.99</b> | 0.44        |
|                                          | MetaPocket 2.0 (236)    | 0.76        | 0.73        | 0.58        | 0.31        | 0.88        | 0.67        | 0.72        | 0.73        | 0.59        | 0.30        | 0.88        | 0.67        | 0.15        | 0.92        | 0.68        |
|                                          | DeepSite (238)          | 0.66        | 0.63        | 0.48        | 0.30        | 0.73        | 0.49        | 0.64        | 0.63        | 0.48        | 0.30        | 0.73        | 0.49        | <b>0.25</b> | 0.73        | 0.49        |
|                                          | P2Rank (238)            | 0.86        | 0.82        | 0.70        | 0.33        | 0.89        | 0.69        | 0.82        | 0.83        | 0.70        | 0.32        | 0.89        | 0.69        | 0.15        | 0.92        | 0.69        |
|                                          | <b>BiteNet (238)</b>    | 0.87        | 0.82        | 0.77        | <b>0.37</b> | 0.91        | 0.82        | 0.83        | 0.83        | 0.78        | <b>0.36</b> | 0.92        | 0.82        | 0.23        | 0.95        | 0.84        |
|                                          | <b>BiteNet R+ (238)</b> | <b>0.87</b> | <b>0.83</b> | <b>0.78</b> | 0.33        | <b>0.93</b> | <b>0.84</b> | <b>0.83</b> | <b>0.84</b> | <b>0.79</b> | 0.33        | <b>0.94</b> | <b>0.85</b> | 0.09        | 0.98        | <b>0.86</b> |
| BiteNet criterion for training           | Fpocket (238)           | 0.38        | 0.36        | 0.13        | 0.16        | 0.44        | 0.15        | 0.37        | 0.37        | 0.13        | 0.15        | 0.44        | 0.15        | 0.04        | 0.52        | 0.16        |
|                                          | SiteHound (167)         | 0.43        | 0.40        | 0.19        | 0.21        | 0.58        | 0.23        | 0.42        | 0.42        | 0.21        | 0.21        | 0.59        | 0.23        | 0.01        | 0.79        | 0.23        |
|                                          | MetaPocket 2.0 (236)    | 0.42        | 0.40        | 0.16        | 0.17        | 0.50        | 0.19        | 0.40        | 0.40        | 0.16        | 0.17        | 0.50        | 0.19        | 0.10        | 0.57        | 0.20        |
|                                          | DeepSite (238)          | 0.37        | 0.35        | 0.17        | 0.17        | 0.40        | 0.18        | 0.35        | 0.35        | 0.16        | 0.17        | 0.40        | 0.18        | 0.14        | 0.40        | 0.18        |
|                                          | P2Rank (238)            | 0.56        | 0.53        | 0.29        | 0.21        | 0.57        | 0.29        | 0.54        | 0.53        | 0.29        | 0.21        | 0.57        | 0.29        | 0.09        | 0.59        | 0.29        |
|                                          | <b>BiteNet (238)</b>    | 0.74        | 0.70        | 0.60        | <b>0.31</b> | 0.78        | 0.63        | 0.70        | 0.71        | 0.59        | <b>0.31</b> | 0.78        | 0.63        | <b>0.19</b> | 0.81        | 0.64        |
|                                          | <b>BiteNet R+ (238)</b> | <b>0.74</b> | <b>0.71</b> | <b>0.61</b> | 0.28        | <b>0.80</b> | <b>0.66</b> | <b>0.71</b> | <b>0.72</b> | <b>0.62</b> | 0.28        | <b>0.81</b> | <b>0.67</b> | 0.08        | <b>0.85</b> | <b>0.67</b> |
| P2Rank binding site filtering criterion  | Fpocket (238)           | 172         | 66          | 112         | 240         | 472         | 75          | 186         | 100         | 99          | 246         | 514         | 71          | 318         | 3237        | 41          |
|                                          | SiteHound (167)         | 104         | 63          | 87          | 171         | 330         | 47          | 112         | 87          | 79          | 175         | 358         | 45          | 338         | 9866        | 7           |
|                                          | MetaPocket 2.0 (236)    | 186         | 50          | 90          | 249         | 459         | 52          | 194         | 90          | 84          | 253         | 503         | 52          | 311         | 1173        | 40          |
|                                          | DeepSite (238)          | 163         | 75          | 119         | 212         | 414         | 92          | 172         | 104         | 115         | 212         | 424         | 92          | 215         | <b>546</b>  | 92          |
|                                          | P2Rank (238)            | 206         | 31          | 68          | 242         | 432         | 49          | 213         | 70          | 62          | 245         | 468         | 46          | 266         | 1296        | 41          |
|                                          | BiteNet (238)           | 213         | 25          | <b>66</b>   | 283         | <b>340</b>  | 38          | <b>230</b>  | <b>54</b>   | <b>53</b>   | 290         | <b>364</b>  | 32          | 315         | 734         | 27          |
|                                          | <b>BiteNet R+ (238)</b> | <b>214</b>  | <b>24</b>   | <b>66</b>   | <b>297</b>  | 411         | <b>36</b>   | 229         | 57          | 55          | <b>304</b>  | 452         | <b>31</b>   | <b>413</b>  | 2335        | <b>17</b>   |
| BiteNet binding site filtering criterion | Fpocket (238)           | 169         | 69          | 82          | 229         | 483         | 52          | 172         | 80          | 79          | 230         | 496         | 52          | 303         | 3252        | 20          |
|                                          | SiteHound (167)         | 103         | 64          | 75          | 169         | 332         | 35          | 108         | 70          | 68          | 173         | 339         | 32          | 325         | 9879        | 1           |
|                                          | MetaPocket 2.0 (236)    | 179         | 57          | 68          | 237         | 471         | 31          | 180         | 70          | 67          | 237         | 485         | 31          | 297         | 1187        | 20          |
|                                          | DeepSite (238)          | 158         | 80          | 93          | 202         | 424         | 69          | 160         | 91          | 93          | 202         | 426         | 69          | 206         | <b>555</b>  | 68          |
|                                          | P2Rank (238)            | 203         | 34          | 46          | 238         | 436         | 28          | 205         | 45          | 44          | 240         | 446         | 27          | 262         | 1300        | 21          |
|                                          | BiteNet (238)           | 206         | 32          | 45          | 266         | <b>357</b>  | 22          | 210         | 42          | 42          | 267         | <b>366</b>  | 21          | 297         | 752         | 13          |
|                                          | <b>BiteNet R+ (238)</b> | <b>208</b>  | <b>30</b>   | <b>42</b>   | <b>283</b>  | 425         | <b>17</b>   | <b>211</b>  | <b>41</b>   | <b>40</b>   | <b>286</b>  | 436         | <b>14</b>   | <b>393</b>  | 2355        | <b>4</b>    |
| BiteNet criterion for training           | Fpocket (238)           | 91          | 147         | 161         | 111         | 601         | 141         | 92          | 160         | 160         | 111         | 615         | 141         | 132         | 3423        | 120         |
|                                          | SiteHound (167)         | 71          | 96          | 107         | 104         | 397         | 74          | 75          | 103         | 103         | 105         | 407         | 73          | 140         | 10064       | 38          |
|                                          | MetaPocket 2.0 (236)    | 99          | 137         | 150         | 124         | 584         | 126         | 99          | 151         | 150         | 124         | 598         | 126         | 147         | 1337        | 107         |
|                                          | DeepSite (238)          | 89          | 149         | 163         | 106         | 520         | 151         | 89          | 162         | 163         | 106         | 522         | 151         | 108         | <b>653</b>  | 150         |
|                                          | P2Rank (238)            | 133         | 104         | 119         | 144         | 530         | 109         | 134         | 116         | 118         | 144         | 542         | 109         | 149         | 1413        | 104         |
|                                          | BiteNet (238)           | 176         | 62          | 75          | 196         | <b>427</b>  | 55          | 177         | 75          | 74          | 196         | <b>437</b>  | 55          | 202         | 847         | 49          |
|                                          | <b>BiteNet R+ (238)</b> | <b>177</b>  | <b>61</b>   | <b>73</b>   | <b>200</b>  | 508         | <b>50</b>   | <b>179</b>  | <b>73</b>   | <b>71</b>   | <b>202</b>  | 520         | <b>48</b>   | <b>212</b>  | 2536        | <b>38</b>   |

The best score values are denoted with bold font. Top TP, FP, FN scores apply only to methods assessed on the same set of proteins as BiteNet.

Supplementary Table 12: Performance metrics on the HOLO4K subset of 2848 proteins, which are not in the BiteNet training set and each structure contains at least one relevant binding site according to the BiteNet binding site filtering criterion.

| Criterion                                | Method                | Top-1       |             |             | Top-3       |             |             | Top-n       |             |             | Top-(n+2)   |             |             | All         |              |      |
|------------------------------------------|-----------------------|-------------|-------------|-------------|-------------|-------------|-------------|-------------|-------------|-------------|-------------|-------------|-------------|-------------|--------------|------|
|                                          |                       | prec        | rec         | ap          | prec        | rec         | ap          | prec        | rec         | ap          | prec        | rec         | ap          | prec        | rec          | ap   |
| P2Rank binding site filtering criterion  | Fpocket (2529)        | 0.65        | 0.30        | 0.20        | 0.38        | 0.53        | 0.33        | 0.49        | 0.54        | 0.34        | 0.32        | 0.64        | 0.38        | 0.07        | 0.79         | 0.40 |
|                                          | SiteHound (1826)      | 0.58        | 0.28        | 0.15        | 0.35        | 0.51        | 0.23        | 0.45        | 0.53        | 0.25        | 0.31        | 0.65        | 0.27        | 0.02        | <b>0.97</b>  | 0.31 |
|                                          | MetaPocket 2.0 (1645) | 0.70        | 0.41        | 0.26        | 0.37        | 0.64        | 0.41        | 0.55        | 0.61        | 0.40        | 0.33        | 0.72        | 0.44        | 0.21        | 0.76         | 0.45 |
|                                          | DeepSite (2516)       | 0.73        | 0.34        | 0.25        | 0.44        | 0.49        | 0.33        | 0.64        | 0.48        | 0.34        | 0.42        | 0.50        | 0.33        | <b>0.38</b> | 0.50         | 0.33 |
|                                          | P2Rank (2848)         | 0.85        | 0.42        | 0.34        | 0.47        | 0.66        | 0.54        | 0.63        | 0.71        | 0.59        | 0.37        | 0.76        | 0.60        | 0.13        | 0.80         | 0.60 |
|                                          | <b>BiteNet (2848)</b> | 0.95        | <b>0.43</b> | 0.42        | <b>0.59</b> | 0.71        | 0.68        | <b>0.79</b> | 0.82        | 0.79        | <b>0.50</b> | 0.86        | 0.80        | 0.31        | 0.88         | 0.81 |
| <b>BiteNet R+ (2848)</b>                 | <b>0.95</b>           | 0.43        | <b>0.42</b> | 0.53        | <b>0.72</b> | <b>0.69</b> | 0.77        | <b>0.83</b> | <b>0.80</b> | 0.45        | <b>0.87</b> | <b>0.81</b> | 0.14        | 0.91        | <b>0.82</b>  |      |
| BiteNet binding site filtering criterion | Fpocket (2529)        | 0.59        | 0.33        | 0.20        | 0.34        | 0.59        | 0.33        | 0.51        | 0.53        | 0.31        | 0.31        | 0.68        | 0.37        | 0.06        | 0.85         | 0.39 |
|                                          | SiteHound (1826)      | 0.56        | 0.33        | 0.17        | 0.33        | 0.57        | 0.24        | 0.48        | 0.51        | 0.24        | 0.31        | 0.69        | 0.27        | 0.02        | <b>1.00</b>  | 0.31 |
|                                          | MetaPocket 2.0 (1645) | 0.67        | 0.47        | 0.29        | 0.35        | 0.73        | 0.44        | 0.61        | 0.64        | 0.40        | 0.33        | 0.79        | 0.46        | 0.19        | 0.84         | 0.47 |
|                                          | DeepSite (2516)       | 0.69        | 0.40        | 0.28        | 0.41        | 0.55        | 0.35        | 0.66        | 0.53        | 0.36        | 0.40        | 0.56        | 0.35        | <b>0.35</b> | 0.56         | 0.35 |
|                                          | P2Rank (2848)         | 0.83        | 0.48        | 0.38        | 0.44        | 0.75        | 0.57        | 0.73        | 0.77        | 0.61        | 0.39        | 0.83        | 0.63        | 0.12        | 0.88         | 0.63 |
|                                          | <b>BiteNet (2848)</b> | 0.91        | <b>0.51</b> | 0.49        | <b>0.54</b> | 0.82        | 0.76        | <b>0.85</b> | 0.87        | 0.82        | <b>0.49</b> | 0.94        | 0.85        | 0.27        | 0.97         | 0.87 |
| <b>BiteNet R+ (2848)</b>                 | <b>0.91</b>           | 0.51        | <b>0.49</b> | 0.49        | <b>0.83</b> | <b>0.78</b> | 0.86        | <b>0.88</b> | <b>0.85</b> | 0.44        | <b>0.95</b> | <b>0.87</b> | 0.12        | 0.99        | <b>0.88</b>  |      |
| BiteNet criterion for training           | Fpocket (2529)        | 0.32        | 0.18        | 0.05        | 0.19        | 0.31        | 0.09        | 0.28        | 0.28        | 0.08        | 0.17        | 0.36        | 0.10        | 0.03        | 0.47         | 0.11 |
|                                          | SiteHound (1826)      | 0.38        | 0.21        | 0.07        | 0.23        | 0.39        | 0.11        | 0.33        | 0.33        | 0.10        | 0.22        | 0.46        | 0.12        | 0.01        | 0.78         | 0.14 |
|                                          | MetaPocket 2.0 (1645) | 0.38        | 0.25        | 0.08        | 0.20        | 0.40        | 0.12        | 0.33        | 0.33        | 0.10        | 0.19        | 0.44        | 0.13        | 0.12        | 0.50         | 0.14 |
|                                          | DeepSite (2516)       | 0.40        | 0.22        | 0.09        | 0.23        | 0.30        | 0.10        | 0.37        | 0.29        | 0.11        | 0.23        | 0.30        | 0.11        | 0.20        | 0.30         | 0.11 |
|                                          | P2Rank (2848)         | 0.52        | 0.29        | 0.12        | 0.27        | 0.44        | 0.17        | 0.45        | 0.45        | 0.18        | 0.24        | 0.49        | 0.19        | 0.08        | 0.52         | 0.19 |
|                                          | <b>BiteNet (2848)</b> | 0.81        | 0.45        | 0.40        | <b>0.48</b> | 0.71        | 0.61        | 0.75        | 0.75        | 0.65        | <b>0.43</b> | 0.81        | 0.68        | <b>0.24</b> | 0.84         | 0.69 |
| <b>BiteNet R+ (2848)</b>                 | <b>0.81</b>           | <b>0.45</b> | <b>0.41</b> | 0.44        | <b>0.73</b> | <b>0.65</b> | <b>0.76</b> | <b>0.77</b> | <b>0.69</b> | 0.39        | <b>0.83</b> | <b>0.72</b> | 0.11        | <b>0.86</b> | <b>0.72</b>  |      |
| P2Rank binding site filtering criterion  | Fpocket (2529)        | 1634        | 895         | 4231        | 3130        | 4442        | 2854        | 3016        | 2990        | 2792        | 3890        | 7141        | 2148        | 5819        | 61897        | 1247 |
|                                          | SiteHound (1826)      | 1055        | 771         | 3097        | 2216        | 3262        | 2112        | 2045        | 2265        | 2035        | 2935        | 5027        | 1488        | 7015        | 174397       | 110  |
|                                          | MetaPocket 2.0 (1645) | 1145        | 500         | 1911        | 1953        | 2982        | 1152        | 1764        | 1343        | 1248        | 2290        | 3948        | 902         | 2661        | 7792         | 787  |
|                                          | DeepSite (2516)       | 1835        | 681         | 3940        | 2747        | 3299        | 3049        | 2559        | 1413        | 3115        | 2785        | 3509        | 3007        | 2800        | 4287         | 3001 |
|                                          | P2Rank (2848)         | 2428        | 420         | 3972        | 3975        | 4322        | 2302        | 4228        | 2456        | 1946        | 4666        | 7313        | 1643        | 5296        | 30274        | 1371 |
|                                          | <b>BiteNet (2848)</b> | 2693        | 155         | <b>3868</b> | 4766        | <b>2820</b> | 1959        | 5374        | <b>1130</b> | 1241        | 6079        | <b>4695</b> | 981         | 6731        | <b>11169</b> | 839  |
| <b>BiteNet R+ (2848)</b>                 | <b>2708</b>           | <b>140</b>  | 3878        | <b>4954</b> | 3544        | <b>1928</b> | <b>5530</b> | 1233        | <b>1158</b> | <b>6413</b> | 5944        | <b>886</b>  | <b>8465</b> | 31445       | <b>613</b>   |      |
| BiteNet binding site filtering criterion | Fpocket (2529)        | 1480        | 1049        | 3050        | 2793        | 4779        | 1897        | 2367        | 2219        | 2148        | 3256        | 6370        | 1477        | 5056        | 62660        | 671  |
|                                          | SiteHound (1826)      | 1015        | 811         | 2199        | 2069        | 3409        | 1394        | 1610        | 1649        | 1588        | 2490        | 4421        | 1021        | 6059        | 175353       | 2    |
|                                          | MetaPocket 2.0 (1645) | 1104        | 541         | 1320        | 1841        | 3094        | 674         | 1509        | 954         | 896         | 2047        | 3654        | 526         | 2445        | 8008         | 400  |
|                                          | DeepSite (2516)       | 1740        | 776         | 2765        | 2562        | 3484        | 2040        | 2331        | 1205        | 2142        | 2595        | 3585        | 2005        | 2611        | 4476         | 1999 |
|                                          | P2Rank (2848)         | 2353        | 495         | 2685        | 3754        | 4543        | 1301        | 3783        | 1380        | 1196        | 4236        | 6340        | 862         | 4778        | 30792        | 645  |
|                                          | <b>BiteNet (2848)</b> | 2584        | 264         | <b>2517</b> | 4418        | <b>3168</b> | 915         | 4452        | 697         | 655         | 5245        | <b>4465</b> | 302         | 5979        | <b>11921</b> | 151  |
| <b>BiteNet R+ (2848)</b>                 | <b>2594</b>           | <b>254</b>  | 2522        | <b>4586</b> | 3912        | <b>898</b>  | <b>4511</b> | <b>662</b>  | <b>604</b>  | <b>5457</b> | 5358        | <b>280</b>  | <b>7513</b> | 32397       | <b>69</b>    |      |
| BiteNet criterion for training           | Fpocket (2529)        | 807         | 1722        | 3779        | 1426        | 6146        | 3157        | 1266        | 3326        | 3315        | 1660        | 7972        | 2921        | 2135        | 65581        | 2454 |
|                                          | SiteHound (1826)      | 686         | 1140        | 2572        | 1273        | 4205        | 1990        | 1079        | 2184        | 2177        | 1501        | 5414        | 1759        | 2547        | 178865       | 723  |
|                                          | MetaPocket 2.0 (1645) | 619         | 1026        | 1857        | 981         | 3954        | 1497        | 815         | 1654        | 1660        | 1099        | 4608        | 1380        | 1255        | 9198         | 1249 |
|                                          | DeepSite (2516)       | 1010        | 1506        | 3561        | 1419        | 4627        | 3199        | 1310        | 2230        | 3262        | 1430        | 4751        | 3188        | 1435        | 5652         | 3185 |
|                                          | P2Rank (2848)         | 1480        | 1368        | 3688        | 2248        | 6049        | 2914        | 2326        | 2843        | 2830        | 2539        | 8043        | 2618        | 2678        | 32892        | 2485 |
|                                          | <b>BiteNet (2848)</b> | 2301        | 547         | 2867        | 3671        | <b>3915</b> | 1492        | 3853        | 1301        | 1308        | 4170        | <b>5543</b> | 991         | 4311        | <b>13589</b> | 850  |
| <b>BiteNet R+ (2848)</b>                 | <b>2316</b>           | <b>532</b>  | <b>2852</b> | <b>3772</b> | 4736        | <b>1391</b> | <b>3949</b> | <b>1230</b> | <b>1212</b> | <b>4258</b> | 6563        | <b>903</b>  | <b>4440</b> | 35470       | <b>721</b>   |      |

The best score values are denoted with bold font. Top TP, FP, FN scores apply only to methods assessed on the same set of proteins as BiteNet.

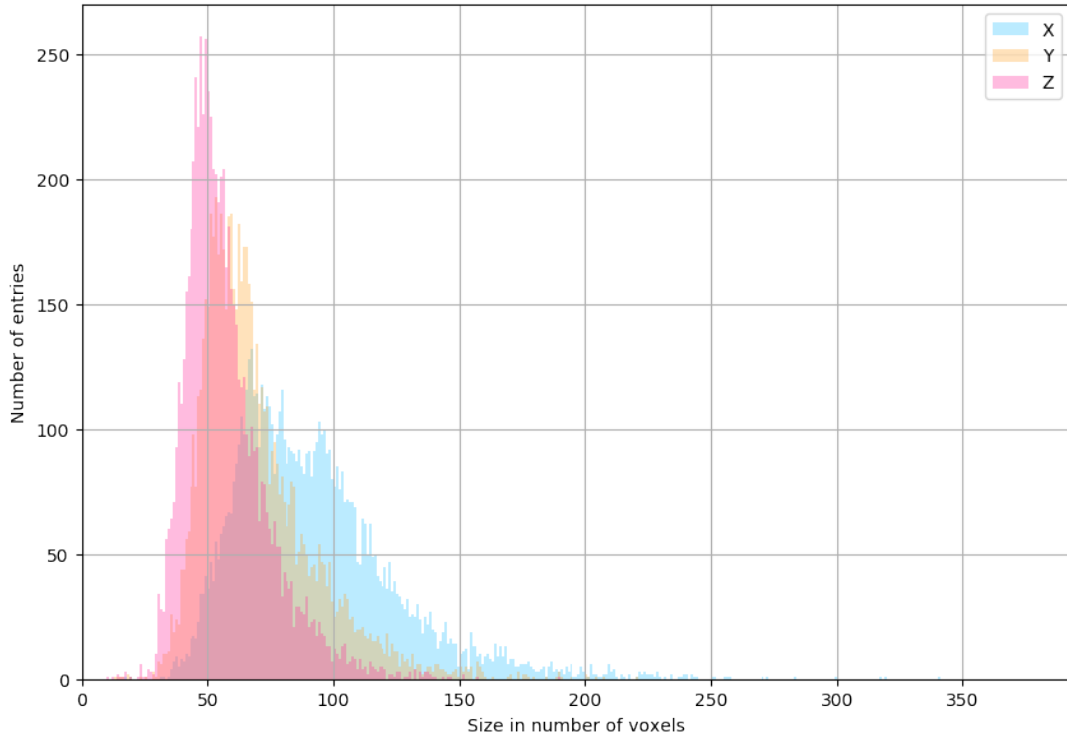

Supplementary Figure 5: Statistics for the protein lengths measured in voxels with respect to its principal axes.

Supplementary Table 13: The average number of binding sites in the COACH420 and HOLO4K benchmarks according to the P2Rank and BiteNet binding site filtering criteria (the first two rows), as well as the average number of method predictions for each dataset. For BiteNet the listed values correspond to the probability score thresholds of 0.01 and 0.1, respectively.

|                   | COACH420  | HOLO4K    |
|-------------------|-----------|-----------|
| P2Rank criterion  | 1.43      | 2.37      |
| BiteNet criterion | 1.05      | 1.84      |
| Fpocket           | 14.60     | 27.01     |
| SiteHound         | 60.23     | 99.87     |
| MetaPocket 2.0    | 6.32      | 6.38      |
| DeepSite          | 3.16      | 2.79      |
| P2Rank            | 6.26      | 12.57     |
| BiteNet           | 4.61/1.52 | 6.35/2.57 |



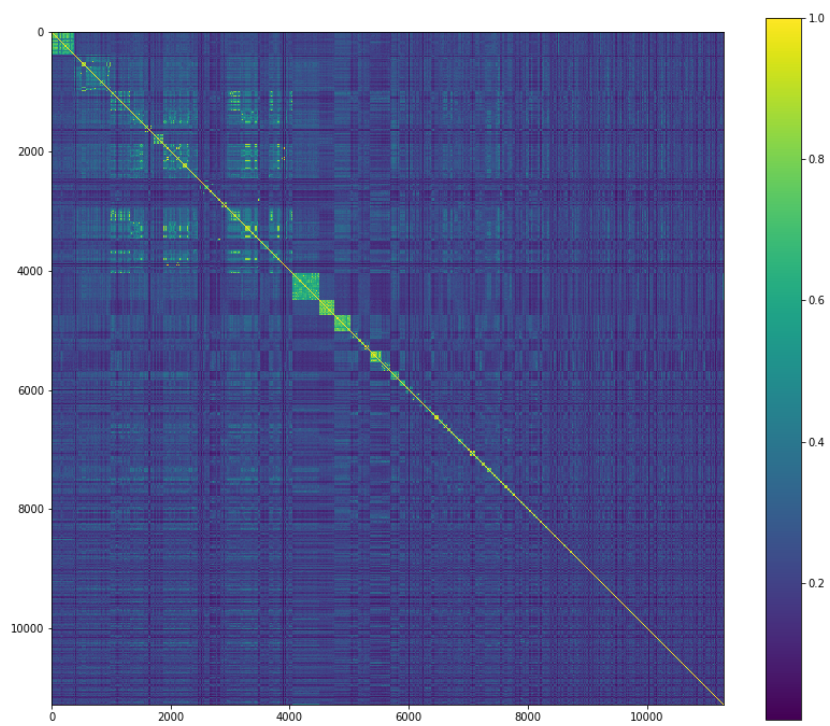

Supplementary Figure 6: Pair-wise structure similarity matrix calculated for the protein chains in the training dataset.

Supplementary Table 14: Statistical tests for comparison of performance of BiteNet with other methods on the set composed from COACH420 and HOLO4K subsets (238 and 1682 proteins, which are not in the BiteNet training set, predictions of all methods available and each structure contains at least one relevant binding site according to the in P2Rank binding site filtering criterion). The T-test is performed: the composed set was split into 31 independent subsets; for each subset precision, recall and average precision (AP) are calculated; the null hypothesis states that there is no significant difference in performance metrics between BiteNet and another method.

|           | Method         | Precision   |         | Recall      |         | AP          |         |
|-----------|----------------|-------------|---------|-------------|---------|-------------|---------|
|           |                | t-statistic | p-value | t-statistic | p-value | t-statistic | p-value |
| Top-1     | Fpocket        | 19.77       | 5.8e-28 | 10.77       | 1.2e-15 | 14.76       | 1.2e-21 |
|           | SiteHound      | 23.62       | 4.4e-32 | 12.53       | 2.1e-18 | 19.03       | 4.2e-27 |
|           | MetaPocket 2.0 | 21.45       | 8.0e-30 | 9.86        | 3.6e-14 | 16.69       | 3.3e-24 |
|           | DeepSite       | 17.40       | 4.1e-25 | 8.41        | 9.7e-12 | 13.17       | 2.3e-19 |
|           | P2Rank         | 7.90        | 7.4e-11 | 1.12        | 2.7e-01 | 5.41        | 1.2e-06 |
| Top-3     | Fpocket        | 17.84       | 1.2e-25 | 9.93        | 2.8e-14 | 16.96       | 1.4e-24 |
|           | SiteHound      | 16.43       | 7.0e-24 | 10.48       | 3.5e-15 | 22.30       | 1.0e-30 |
|           | MetaPocket 2.0 | 19.36       | 1.7e-27 | 10.18       | 1.1e-14 | 19.75       | 6.1e-28 |
|           | DeepSite       | 14.62       | 1.9e-21 | 13.85       | 2.4e-20 | 21.07       | 2.1e-29 |
|           | P2Rank         | 13.39       | 1.1e-19 | 2.95        | 4.6e-03 | 8.14        | 2.8e-11 |
| Top-N     | Fpocket        | 19.53       | 1.1e-27 | 13.05       | 3.5e-19 | 17.68       | 1.8e-25 |
|           | SiteHound      | 21.81       | 3.2e-30 | 14.77       | 1.2e-21 | 22.15       | 1.4e-30 |
|           | MetaPocket 2.0 | 21.39       | 9.1e-30 | 13.26       | 1.7e-19 | 20.55       | 7.7e-29 |
|           | DeepSite       | 14.11       | 1.0e-20 | 16.54       | 5.0e-24 | 20.83       | 3.7e-29 |
|           | P2Rank         | 13.87       | 2.3e-20 | 4.26        | 7.3e-05 | 8.39        | 1.1e-11 |
| Top-(N+2) | Fpocket        | 19.76       | 6.0e-28 | 9.07        | 7.4e-13 | 17.22       | 6.9e-25 |
|           | SiteHound      | 16.73       | 2.9e-24 | 8.63        | 4.1e-12 | 22.39       | 7.9e-31 |
|           | MetaPocket 2.0 | 19.20       | 2.6e-27 | 9.55        | 1.2e-13 | 20.14       | 2.2e-28 |
|           | DeepSite       | 11.48       | 8.8e-17 | 18.08       | 5.8e-26 | 23.66       | 4.1e-32 |
|           | P2Rank         | 18.31       | 3.1e-26 | 3.75        | 4.0e-04 | 9.05        | 8.0e-13 |
| All       | Fpocket        | 42.87       | 1.0e-46 | 2.68        | 9.5e-03 | 17.19       | 7.4e-25 |
|           | SiteHound      | 52.85       | 5.0e-52 | -13.02      | 4.0e-19 | 22.23       | 1.2e-30 |
|           | MetaPocket 2.0 | 18.32       | 3.0e-26 | 8.08        | 3.6e-11 | 20.35       | 1.3e-28 |
|           | DeepSite       | 1.18        | 2.4e-01 | 18.99       | 4.7e-27 | 24.34       | 8.8e-33 |
|           | P2Rank         | 30.67       | 2.3e-38 | 2.33        | 2.3e-02 | 9.56        | 1.1e-13 |
